# Supplementary material for: Effect of Traffic Exposure on Sick Building Syndrome Symptoms among Parents/Grandparents of Preschool Children in Beijing, China
Source: PLoS One. 2015 Jun 18;10(6):e0128767. doi: 10.1371/journal.pone.0128767 (PMC4472806; doi:10.1371/journal.pone.0128767)
Supplement: S1 File — (XLSX) [file pone.0128767.s001.xlsx]

## Sheet: Sheet1
General	Mucous	Skin	Relationship to the kid	Living near highways or major roads	Frequency of window opening	Air cleaning device	Building Age	Ownership	ETS
Yes	Yes	Yes	mother	No	never	No	before 1980	No	No
Yes	Yes	Yes	grandmother	No	never	Yes	1991-2000	No	Yes
Yes	Yes	No	mother	No	never	No	after 2006	Yes	Yes
Yes	Yes	Yes	mother	Yes	never	No	1991-2000	No	Yes
No	Yes	Yes	mother	No	never	No	2001-2005	No	No
Yes	No	No	mother	No	sometimes	No	1991-2000	No	Yes
Yes	Yes	No	others	No	never	No	1991-2000	Yes	Yes
No	Yes	Yes	mother		never	Yes	1991-2000	Yes	Yes
Yes	Yes	Yes	father	No	never	No	1991-2000	No	Yes
Yes	Yes	Yes	mother	Yes	never	No	2001-2005	Yes	No
Yes	No	No	mother	No	never	No	2001-2005	Yes	No
No	Yes	No	mother	Yes	never	No	1980-1990	Yes	Yes
Yes	Yes	Yes	mother	Yes	sometimes	No	1980-1990	No	No
Yes	Yes	No	mother	No	never	No	1991-2000	Yes	Yes
Yes	Yes	No	mother	No	never	No	1991-2000	Yes	Yes
Yes	Yes	Yes	mother	No	never	No	1991-2000	Yes	Yes
No	No	No	mother	No	never	No	1991-2000	No	Yes
Yes	No	No	mother		never	No	2001-2005	Yes	No
No	No	Yes	mother	No	sometimes	No	1991-2000	Yes	No
No	No	Yes	mother	Yes	never	No	2001-2005	No	Yes
No	No	No	mother	No	never	No	2001-2005	Yes	No
No	Yes	No	mother	Yes	sometimes	Yes	2001-2005	Yes	Yes
No	No	No	mother	No	never	No	1980-1990	No	No
Yes	Yes	Yes	mother		sometimes	Yes	2001-2005	Yes	Yes
Yes	Yes	Yes	mother		never		1991-2000	Yes	Yes
No	Yes	Yes	mother	Yes	never		before 1980	Yes	No
No	No	No	mother	No	never	No	1991-2000	Yes	Yes
Yes	Yes	Yes	mother	No	never	No	2001-2005	Yes	Yes
Yes	Yes	Yes	mother	Yes	sometimes	No	after 2006	Yes	Yes
Yes	No	No	mother	No	sometimes	No	2001-2005	Yes	No
Yes	Yes	Yes	mother	No	sometimes	No	1991-2000	Yes	No
Yes	Yes	Yes	mother	No	never	No	2001-2005	Yes	No
Yes	Yes	Yes	mother	Yes	sometimes	No	1991-2000	No	No
Yes	No	Yes	mother	No	never	No	after 2006	Yes	No
Yes	Yes	Yes	mother	No	never	No	2001-2005	Yes	No
No	Yes	No	mother	Yes	never	No	2001-2005
No	No	No	father	No	never	No	1980-1990	Yes	No
Yes	Yes	Yes	mother	Yes	never	No	1991-2000	Yes	Yes
Yes	No	No	mother		never	No	after 2006	Yes	No
Yes	Yes	Yes	mother	Yes	never	No	1991-2000	Yes	Yes
No	No	Yes	mother	No	sometimes	No	2001-2005	No	Yes
No	No	No	father	No	always	No		No	Yes
No	No	No	father	Yes	never	No	2001-2005	Yes	No
No	No	No	father	No	never	No	after 2006	No	Yes
No	No	No	mother	No	sometimes	No	1980-1990	Yes	Yes
No	No	No	mother	Yes	sometimes	No	before 1980	No	No
No	No	No	father	No	never	No	before 1980	No	Yes
No	Yes	No	father	No	never	No	2001-2005	Yes	Yes
No	No	Yes	mother		never	No	2001-2005	No	Yes
No	No	No	father		never		after 2006	Yes	Yes
No	Yes	Yes	others		sometimes		after 2006	Yes	No
Yes	No	Yes	father	Yes	never	No	1991-2000	No	No
No	No	No	mother	Yes	never	No	2001-2005	Yes	Yes
No	No	Yes	Nose/EyeAsthma	Yes	sometimes	No	2001-2005	Yes	Yes
Yes	Yes	Yes	father	No	sometimes	No	after 2006	Yes	No
Yes	No	Yes	mother	No	never	No	after 2006	Yes	No
Yes	Yes	Yes	mother	Yes	never	No	after 2006	Yes	No
Yes	Yes	Yes	mother	Yes	always	No	2001-2005	Yes	Yes
Yes	Yes	Yes	father	No	never	No	after 2006	Yes	No
Yes	Yes	No	mother	Yes	never	No	2001-2005	No	Yes
Yes	Yes	Yes	father	Yes	sometimes	No	after 2006	No	No
No	No	No	mother		sometimes	No	before 1980	No	Yes
Yes	No	No		No	sometimes	No	1991-2000	No	No
No	No	Yes	mother	No	sometimes	Yes	after 2006	Yes	Yes
Yes	Yes	No	mother	No	never	No	after 2006	No	Yes
Yes	No	Yes	mother	No	sometimes	No	2001-2005	Yes	No
No	No	No	mother	No	sometimes	Yes	1991-2000	Yes	Yes
No	No	No	mother	Yes	always	No	1991-2000	No	Yes
No	No	No	mother	No	never	Yes	2001-2005	Yes	Yes
No	No	No	mother			No	2001-2005	No	Yes
No	No	No	mother			Yes	after 2006	Yes	Yes
No	No	No	mother	Yes	never	No	1991-2000	No	No
No	Yes	No	mother	No	never	No	1980-1990	No	No
No	Yes	Yes	2Nose/Eye	No	never	No	before 1980	No	Yes
No	No	Yes	grandfather	No		No	2001-2005	Yes	Yes
No	No	No	Yes2	No	never	Yes	2001-2005	Yes	Yes
No	No	No	mother	Yes	always	No	2001-2005	Yes	Yes
Yes	No	Yes	mother	Yes	never	No	1980-1990	No	Yes
No	No	No	mother		sometimes	No	1991-2000	Yes	Yes
No	No	No	mother	No	sometimes	No	2001-2005	Yes	No
No	No	No	mother		sometimes	No	2001-2005	Yes	Yes
No	No	Yes			never		2001-2005	Yes	No
Yes	No	Yes	mother		sometimes		1991-2000	No	Yes
No	Yes	Yes	grandmother		sometimes		1991-2000	No	Yes
No	Yes	Yes	grandmother		never	Yes	2001-2005	Yes	Yes
No	Yes	No	mother		never		2001-2005	No	Yes
Yes	Yes	Yes	mother	Yes	never	Yes	2001-2005	No	No
No	No	No		Yes	sometimes	No	after 2006	No	Yes
No	Yes	Yes	mother		never		after 2006	Yes	No
Yes	Yes	Yes	father	No	never	No	2001-2005	Yes	Yes
No	No	No	father	Yes	never	No	2001-2005	Yes	Yes
No	No	Yes	mother	No	sometimes	No	1991-2000	Yes	Yes
Yes	Yes	No	mother	No	never	No	2001-2005	Yes	No
Yes	Yes	Yes	mother	Yes	never	No	1991-2000	No	No
No	Yes	Yes	father	No	sometimes	No	2001-2005	Yes	Yes
Yes	Yes	Yes	mother	No	sometimes	No	2001-2005	Yes	Yes
No	No	No	grandfather		never	No	1980-1990	Yes	Yes
No	No	No	mother	No		No	2001-2005	Yes	Yes
Yes	Yes	Yes	mother	No	never	Yes	2001-2005	Yes	Yes
Yes	No	Yes	grandmother	Yes	never	No	2001-2005	Yes	Yes
No	No	No	mother	No	never	No	2001-2005	Yes	No
No	Yes	No	mother	No	never	Yes	after 2006	Yes	Yes
No	No	Yes	Yes2	Yes	never	No	2001-2005	No	No
No	No	No	mother	Yes	never	No	after 2006	Yes	Yes
No	No	Yes	father	No	never	No	after 2006	No	Yes
No	No	No	mother	Yes	never	No	before 1980	No	No
No	Yes	No	father	No	sometimes	No	after 2006	Yes	Yes
No	No	No	mother	No	sometimes	No		Yes	Yes
No	No	No	mother	No	never	No	after 2006	Yes	Yes
No	No	No	mother	No	never	No	2001-2005	No	No
No	Yes	Yes	mother	No	never	No	1991-2000	No	No
Yes	No	Yes	mother	Yes	never	No	2001-2005	Yes	Yes
Yes	Yes	No	mother	Yes	never	No	1991-2000	Yes	Yes
Yes	No	Yes	mother	No	never	No	1991-2000	No	No
Yes	No	Yes	mother	Yes	never	No	2001-2005	Yes	No
Yes	No	No	mother	No	never	Yes	1991-2000	No	Yes
Yes	No	Yes	mother	Yes	never	No	after 2006	Yes	Yes
Yes	No	Yes	mother	Yes	sometimes	No	2001-2005	Yes	Yes
Yes	Yes	Yes	mother	No	never	No	after 2006	Yes	No
Yes	No	No	mother	Yes	never	No	2001-2005	Yes	Yes
No	No	No	mother	No	never	No	1980-1990	Yes	Yes
No	Yes	Yes	mother	No	never	No	2001-2005	No	Yes
No	Yes	No	mother	No	never	No	2001-2005	Yes	No
Yes	No	No	father	No	never	No	after 2006	No	Yes
No	No	No	mother	No	sometimes	No	2001-2005	Yes	Yes
Yes	Yes	Yes	mother	No	never	Yes	1980-1990	Yes	No
No	No	Yes	grandfather	No	never	No	1980-1990	Yes	Yes
No	No	No	mother	Yes	never	No	1991-2000	Yes	Yes
No	No	No	father	Yes	sometimes	No	after 2006	Yes	Yes
No	No	No	mother	Yes	never	No	2001-2005	Yes	No
No	No	No	father	Yes	never	No	after 2006	Yes	Yes
No	No	No	mother	No	never	No	before 1980	No	Yes
No	No	No	mother	No	never	No	before 1980	No	Yes
No	No	Yes	grandmother	No	never	No	after 2006	Yes	No
No	No	No	grandmother	No	never	No	after 2006	Yes	Yes
No	No	No	father		never	No	after 2006	Yes	Yes
No	No	No	mother	No	never	No	2001-2005	Yes	Yes
No	Yes	No	mother	No	never	No	1980-1990	No	Yes
No	No	No	mother	No	never	Yes	2001-2005	Yes	No
No	No	Yes	mother	No	never	No	2001-2005	Yes	Yes
No	No	Yes	mother	No	sometimes	No	after 2006	No	No
No	Yes	No	mother	Yes	never	No	after 2006	No	No
No	No	No	mother	No	never	No	2001-2005	Yes	No
No	Yes	Yes	mother	Yes	sometimes	No	1980-1990	Yes
Yes	No	Yes	father	No	never	No	1991-2000	No	Yes
Yes	No	Yes	mother		never	Yes	2001-2005	Yes	Yes
No	Yes	Yes	mother		never		2001-2005	Yes	Yes
No	No	Yes		Yes	never		after 2006	Yes	Yes
No	No	No	mother		never		2001-2005	Yes	No
Yes	No	No	mother	No	sometimes	No	2001-2005	Yes	Yes
Yes	Yes	No	father	No	sometimes	No	1980-1990	Yes	No
Yes	Yes	Yes	mother	No	sometimes	No	1991-2000	No	Yes
Yes	No	Yes	mother	No	never	No	1980-1990	No	Yes
Yes	Yes	Yes	father	No	sometimes	Yes	after 2006	Yes	No
No	Yes	No	mother	No	sometimes	No	before 1980	Yes	No
Yes	Yes	Yes	father		sometimes	No	2001-2005	Yes	No
Yes	No	No	father	No	never	No	2001-2005	Yes	Yes
Yes	Yes	No	grandfather		never	No	1991-2000	Yes	No
Yes	Yes	Yes	mother	Yes	never	No	1991-2000	No	Yes
Yes	Yes	Yes	mother	No	sometimes	No	2001-2005	No	Yes
Yes	Yes	No	mother	No		No	1991-2000	No	Yes
Yes	Yes	Yes	father	Yes	never	No	2001-2005	Yes	Yes
Yes	Yes	Yes	father	Yes	never	No	2001-2005	Yes	No
Yes	Yes	Yes	father	Yes	always	No	2001-2005	Yes	No
Yes	Yes	Yes	father	Yes	sometimes	No	after 2006	Yes	Yes
Yes	No	Yes	mother		never	No	2001-2005	Yes	Yes
Yes	No	No	mother	Yes		No	before 1980	No	Yes
Yes	Yes	No	mother	No	sometimes	No	2001-2005	Yes	No
No	No	No	mother	No	never	No	2001-2005	Yes	Yes
Yes	Yes	No	mother	Yes	never	No	2001-2005	Yes	No
No	No	No	Yes2	No		No	1991-2000	Yes	Yes
Yes	No	No	mother		never	No	2001-2005	Yes	Yes
Yes	No	Yes	father	Yes	never	No	1980-1990	No	No
Yes	No	Yes	mother			No	after 2006
Yes	Yes	No	father	No	never	No		No	Yes
Yes	Yes	Yes	mother	No	sometimes	Yes	after 2006	Yes	No
No	Yes	Yes	mother	Yes	never	No	before 1980	No	Yes
No	No	No	mother	No	never	No	2001-2005	Yes	Yes
No	No	No	mother	No	sometimes	No	1991-2000	No	No
No	No	No	father	No	never	No	2001-2005	Yes	Yes
No	No	No	mother		sometimes	No	2001-2005	Yes	Yes
No	No	No	grandfather		never	No	1991-2000	Yes	Yes
No	Yes	Yes	mother	No	never	No	2001-2005	Yes	Yes
No	No	No	Nose/EyeAsthma	No		No	2001-2005	Yes	Yes
No	No	No		Yes	never	No	1980-1990	Yes	No
No	No	No	grandmother	No	sometimes	No	1991-2000	Yes	No
No	No	No	mother	No	never	Yes	after 2006	Yes	No
No	No	No	mother	No	never	No	2001-2005	Yes	No
No	No	No	grandmother		never	No	2001-2005	Yes	No
No	No	No	mother	Yes	never	No	2001-2005	Yes	No
No	No	No	mother	No	never	No	2001-2005	No	No
No	No	No	mother	No	sometimes	No	2001-2005	Yes	Yes
No	No	No	mother		never	No	after 2006	Yes	No
No	Yes	No	mother	Yes	never	No	2001-2005		Yes
No	No	Yes	mother	No	never	No	2001-2005	Yes	Yes
No	No	No	mother	No	sometimes	Yes	2001-2005	Yes	Yes
No	Yes	No	mother	No	never	No	1991-2000	No	No
No	Yes	Yes	mother	Yes	never	No	1980-1990	No	No
No	No	No	mother	No	never	No	after 2006	Yes	No
No	No	No	grandfather		never	Yes	2001-2005	Yes	Yes
No	Yes	Yes	mother	No	never	No	2001-2005	No	No
No	No	Yes	father	No	sometimes	No	1991-2000	No	Yes
No	No	No	father	No	never	No	after 2006	No	No
No	No	No	father			No	2001-2005	Yes	No
No	No	No	mother		never	No	1991-2000	No	Yes
Yes	No	No	father	No	sometimes	No	1980-1990	No	Yes
No	No	No	mother	No	sometimes	No	1991-2000	No	Yes
Yes	Yes	Yes	father	Yes	never	No	2001-2005	Yes	No
No	No	No	mother	No	never	Yes		Yes	No
No	No	Yes	mother	No	never	No	2001-2005	Yes	Yes
No	No	No	mother	No	never	No	2001-2005	No	Yes
No	No	No	father		always		2001-2005	Yes	Yes
No	No	Yes	mother	Yes	sometimes	Yes	after 2006	Yes	Yes
No	No	No	father		always		after 2006	Yes	Yes
No	Yes	No	mother	Yes	never	Yes	before 1980	Yes	Yes
Yes	Yes	Yes	mother		never		2001-2005	Yes	Yes
Yes	No	Yes	mother	No	sometimes	Yes	2001-2005	Yes	No
Yes	No	No	mother	No	sometimes	No	1991-2000	Yes	No
No	No	No	father	No	sometimes	No	2001-2005	Yes	No
No	No	No	others	No	sometimes	No	after 2006	Yes	No
Yes	No	No	father	Yes	never		2001-2005	No	Yes
Yes	Yes	Yes	father	No	sometimes	No	2001-2005	Yes	Yes
Yes	Yes	Yes	mother	No	never	Yes	1980-1990	Yes	Yes
Yes	Yes	No	mother	No	never	No	2001-2005	No	Yes
Yes	Yes	Yes	mother	No	never	Yes	2001-2005	Yes	Yes
Yes	No	No	mother	No	never	No	before 1980	Yes	No
Yes	Yes	Yes	mother	No	never	No	1991-2000	Yes	No
Yes	Yes	Yes	mother	No	sometimes	No	2001-2005	Yes	Yes
Yes	Yes	No	mother	No	sometimes	No	2001-2005	Yes	Yes
Yes	Yes	No	mother	No	never	No	1991-2000	Yes	No
Yes	No	Yes	mother	Yes	never	No	2001-2005	Yes	Yes
Yes	No	Yes	grandmother	Yes	never	No	after 2006	Yes	No
Yes	Yes	Yes	mother	Yes	never	Yes	2001-2005	Yes	Yes
Yes	Yes	Yes	mother	No	sometimes	No	2001-2005	Yes	No
Yes	No	No	mother	No	never	No	2001-2005	Yes	No
Yes	No	Yes	mother	No	never	No	1991-2000	No	Yes
Yes	Yes	Yes	mother	Yes	sometimes	No	1980-1990	No	Yes
Yes	No	Yes		Yes		No	before 1980	No	Yes
Yes	No	No	mother	No	sometimes	No	2001-2005	Yes	No
Yes	No	No	mother	No	never	No	1991-2000	No	No
Yes	No	No	mother	Yes	sometimes	No	after 2006	No	Yes
Yes	No	No	father	No	never	No	before 1980	No	Yes
Yes	Yes	Yes	mother	No	sometimes	No	2001-2005	Yes	No
Yes	Yes	Yes	father	No	sometimes	No	before 1980	Yes	Yes
Yes	No	No	father		sometimes	No	2001-2005	Yes	No
Yes	No	No	mother	Yes	sometimes	No	2001-2005	Yes	Yes
Yes	No	Yes	mother	No	sometimes	No	2001-2005	Yes	No
Yes	No	Yes	mother	No	sometimes	Yes	2001-2005	No	Yes
Yes	No	No	mother	Yes	never	No	1980-1990	Yes	No
Yes	No	No	mother	No	never	No	after 2006	No	No
Yes	No	Yes	father	No	never	No	1980-1990	No	Yes
Yes	No	No	mother	No	never	No	1980-1990	No	No
Yes	No	Yes	mother		never	No	2001-2005	Yes	No
No	No	No	mother	No	never	No	2001-2005	Yes	No
Yes	Yes	Yes	mother	No	never	No	1980-1990	No	No
Yes	No	Yes	mother	Yes	never	Yes	2001-2005	No	Yes
Yes	Yes	No	grandmother	Yes	always	No	1980-1990	No	No
Yes	Yes	Yes	mother			No	after 2006	Yes	No
Yes	No	No	mother	Yes	never	No	2001-2005	Yes	No
Yes	Yes	Yes	mother	Yes	sometimes		after 2006	No	Yes
No	Yes	Yes	father	No	sometimes	No	after 2006	Yes	No
No	Yes	No	mother	No	never	Yes	before 1980	No	Yes
No	No	No	mother	No	never	No	2001-2005	Yes	Yes
Yes	No	No	mother	No	never	No	1991-2000	No	Yes
No	No	No	grandmother	No	never	No	1991-2000	Yes	Yes
No	No	Yes	father	No	sometimes	No	before 1980	No	Yes
No	No	Yes	mother	No	never	No	before 1980	Yes	No
Yes	Yes	Yes	mother	No	never	No	2001-2005	Yes	No
Yes	Yes	No	mother	No	never	No	after 2006	Yes	Yes
Yes	No	No	mother	No	never	No	1991-2000	No	Yes
No	No	No	mother	No	never	No	2001-2005	Yes	Yes
No	No	Yes	mother	No	never	No	2001-2005	No	No
Yes	Yes	Yes	father	Yes	never	No	1980-1990	No	Yes
No	No	Yes	mother		sometimes	No	1980-1990	No
No	No	No	mother	Yes	never	No	1980-1990	Yes	No
No	No	No	mother	No	never	No	2001-2005	Yes	No
No	No	Yes	mother	No	never	No	2001-2005	No	No
No	No	Yes	mother	No	never	No	2001-2005	No	Yes
No	No	No	others	No	never	No	after 2006	No	Yes
No	No	No	father	Yes	never	No	before 1980	No	Yes
No	No	No	mother	No	never	No	2001-2005	Yes	Yes
No	No	No	father	Yes	sometimes	No	2001-2005	No	Yes
No	No	No	mother	No	never	No	2001-2005	Yes	No
No	No	No	father	No	never	No	1980-1990	No	No
No	No	No	others	No	never	No	after 2006	Yes	Yes
No	No	No	mother	Yes	never	Yes	2001-2005	Yes	Yes
No	No	No	mother	No	never	No	2001-2005	Yes	No
No	No	No	mother			No	1991-2000	Yes
No	No	No	mother	No	sometimes	No	before 1980	Yes	Yes
No	No	No	mother		never				Yes
No	No	No	father	No	never	No	1991-2000	No	No
No	No	No	father		sometimes	No	1980-1990	No	Yes
Yes	No	No	mother	Yes	never	No	2001-2005	Yes	No
No	No	No	mother	No	never	No	after 2006	Yes	Yes
No	No	No	mother	No	always	No	after 2006	Yes	Yes
No	No	No	father		never	No	2001-2005	Yes	No
No	No	Yes	mother	No	never	No	1980-1990	No	No
No	No	No	mother	No	sometimes	Yes	2001-2005	Yes	Yes
No	No	No	mother	Yes	never	No	1991-2000	Yes	No
No	No	No	mother	No	never	No	2001-2005	Yes	Yes
No	No	Yes	father		never	No	2001-2005		No
No	No	No	mother	No	never	No	before 1980	Yes	No
No	No	Yes	mother	No	never	No	2001-2005	Yes	No
Yes	No	Yes	mother	No	never	No	2001-2005	Yes	No
No	No	No	mother	No	never	Yes	after 2006	No	Yes
No	No	No		No	never	No	after 2006	Yes	Yes
No	No	No	father	No	sometimes	Yes	2001-2005	Yes	Yes
No	No	No	mother	No	never	No	2001-2005	Yes	No
No	No	No	mother		never	No	after 2006	Yes	No
No	No	Yes	mother	No	sometimes	No	2001-2005	Yes	Yes
No	No	No	mother	No	never	Yes	after 2006	Yes	Yes
No	No	No	mother	No	never	No	after 2006	Yes	Yes
No	Yes	No	mother	No	always	No	1980-1990	No	No
No	No	No	father	Yes	never	No	after 2006	Yes	No
No	No	Yes	mother	Yes	always	No	after 2006	Yes	Yes
No	No	No	father	Yes	never	No	1991-2000	Yes	No
No	No	Yes	mother	Yes	never	No	2001-2005	Yes	Yes
No	No	Yes	mother	Yes	never	No	2001-2005	Yes	No
No	No	No	mother	No	never	No	2001-2005	Yes	Yes
No	No	No	mother	No	never	No	after 2006	Yes	No
No	No	No	mother	No	never	No	2001-2005	Yes	No
No	No	No	mother	No	never	No	2001-2005	No	Yes
No	No	No	mother	No	always	No	2001-2005	Yes	Yes
No	No	No	mother	Yes	never	Yes	2001-2005	Yes	No
No	Yes	Yes	mother	Yes	never	Yes	1980-1990	Yes	Yes
No	No	Yes	mother	Yes	sometimes	No	after 2006	Yes	Yes
No	Yes	Yes	father	Yes	never	No	1980-1990	No	Yes
No	No	Yes	father		always	No	1991-2000	Yes	Yes
No	No	No	mother	No	never	No	2001-2005	Yes	Yes
No	Yes	Yes	others	No	never	No	1980-1990	No	No
No	No	No	father	No	sometimes	No	1991-2000	No	Yes
No	No	No	mother			No	after 2006	Yes	Yes
No	Yes	No	mother	No	sometimes	No	1991-2000	Yes	Yes
No	No	No	mother	Yes	never	No	after 2006	Yes	Yes
No	No	No	mother		never	No	2001-2005	Yes	Yes
No	No	No	mother	Yes	sometimes		after 2006	Yes	Yes
No	No	No	mother	Yes	never	No	2001-2005	Yes	No
Yes	Yes	Yes	mother	Yes	never	No	2001-2005	Yes	No
No	No	No	mother	Yes		No	1991-2000	No	No
No	Yes	No	mother	No	sometimes	Yes	2001-2005	Yes	No
No	No	No	mother	No	never	No	1991-2000	No	No
No	No	No	father	No	always	No	2001-2005	Yes	Yes
No	No	No	mother		sometimes	No	2001-2005	Yes	Yes
No	No	No	mother	No	never	No	after 2006	Yes	Yes
No	No	No	mother	No	sometimes	No	1991-2000	Yes	No
Yes	Yes	Yes	mother		sometimes		2001-2005	Yes	No
Yes	No	No	father		never		1991-2000	Yes	No
No	No	Yes	mother		never		2001-2005	No	No
Yes	No	Yes	mother		sometimes		2001-2005	No	Yes
No	No	No	mother		never		1991-2000	Yes	Yes
No	Yes	Yes	mother		never		after 2006	Yes	Yes
Yes	Yes	Yes	father	Yes	always		2001-2005	Yes	Yes
No	No	No	grandmother		sometimes		2001-2005	Yes	No
No	No	No	mother		sometimes		2001-2005	Yes	Yes
No	No	No	mother	Yes	never		1991-2000	No	Yes
No	No	Yes	mother	Yes	never		1991-2000	Yes	Yes
No	No	No	mother		never		2001-2005	Yes	Yes
No	No	No	mother		never		2001-2005	Yes	No
No	No	No	mother		never		2001-2005	Yes	No
No	Yes	No	mother		never		after 2006	Yes	Yes
No	No	No	father	Yes	never		2001-2005	Yes	Yes
No	No	Yes	father		sometimes		1991-2000	No	No
No	No	No	grandmother				2001-2005
Yes	Yes	Yes	mother	Yes	never	No	2001-2005	Yes	Yes
Yes	No	No	mother	Yes	sometimes	Yes	after 2006	Yes	No
Yes	Yes	Yes	mother	No	sometimes	No	1980-1990	No	No
Yes	Yes	Yes	father	Yes	never	No	2001-2005	No	Yes
Yes	Yes	Yes		Yes	never	No	after 2006	No	No
Yes	Yes	Yes	mother	Yes	never	No	2001-2005	Yes	Yes
Yes	Yes	Yes	father	No	never	No	1991-2000	Yes	No
Yes	No	No	father	No	never	No	2001-2005	Yes	Yes
Yes	No	No	mother	No	never	No	after 2006	Yes	Yes
No	No	No	mother	No	never	No	2001-2005	No	No
Yes	No	Yes	mother	No	never	No	1991-2000	No	No
Yes	Yes	No	mother	Yes	never	No	2001-2005	No	Yes
Yes	Yes	No	father	No	sometimes	No	2001-2005	Yes	No
Yes	Yes	Yes	mother	No	never	No	before 1980	No	No
No	No	No	mother	No	never	No	2001-2005	No	Yes
Yes	No	Yes	mother	No	sometimes	Yes	2001-2005	Yes	No
Yes	Yes	Yes	mother	Yes	never	No	after 2006	Yes	No
Yes	No	Yes	mother	Yes	never	No	after 2006	Yes	Yes
Yes	Yes	Yes	mother	No	never	No	2001-2005	Yes	Yes
Yes	No	No	mother	No	never	No	after 2006	Yes	Yes
Yes	Yes	Yes	mother		never	No	after 2006	Yes	No
Yes	Yes	No	mother	No	sometimes	No	2001-2005	Yes	Yes
Yes	Yes	Yes	mother	No	sometimes	No	2001-2005	Yes	Yes
Yes	No	Yes	mother	Yes	never	Yes	2001-2005	Yes	No
Yes	No	Yes	father	No	never	No	2001-2005	Yes	No
Yes	No	No	mother	No	never	No	1991-2000	Yes	Yes
Yes	No	No	mother	Yes	sometimes	No	1980-1990	No	No
Yes	No	No	mother	No	never	No	1980-1990	Yes	No
Yes	No	No	mother	Yes	always	Yes	2001-2005	Yes	No
Yes	No	No	mother	Yes	sometimes	No	1980-1990	Yes	No
Yes	No	Yes	mother	Yes	never	No	1991-2000	No	Yes
Yes	No	Yes	mother	Yes	never	No	2001-2005	Yes	No
Yes	Yes	No	mother	Yes	always	No	2001-2005	Yes	No
Yes	Yes	Yes	mother	No	never	No	2001-2005	Yes	No
Yes	No	No	mother	Yes	never	No	2001-2005	Yes	Yes
Yes	Yes	Yes	father	No	sometimes	No	before 1980	No	Yes
Yes	Yes	Yes	mother	No	sometimes	No	1980-1990	No	Yes
Yes	Yes	Yes	father	No	sometimes	No	2001-2005	Yes	No
Yes	No	No	father	No	sometimes	No	1980-1990	No	No
Yes	Yes	No	father	No	never	No	2001-2005	Yes	No
Yes	No	Yes	mother		never	No	2001-2005	Yes	No
Yes	Yes	Yes	mother	No	never	No	2001-2005	Yes	No
Yes	No	No	mother		never	No	1980-1990	Yes	No
Yes	Yes	Yes	mother	Yes	never	No	1980-1990	No	No
Yes	Yes	No		No	sometimes	No	after 2006	No	No
Yes	Yes	Yes	mother	Yes	sometimes	No	1991-2000	No	Yes
Yes	No	Yes	mother	Yes	never	No	2001-2005	No	No
Yes	Yes	No	mother	No	always	No	1991-2000	No	Yes
Yes	Yes	Yes	mother	No	always	No	2001-2005	Yes	Yes
Yes	Yes	Yes	mother	No	never	Yes	2001-2005	Yes	No
Yes	No	Yes	mother	Yes	never		1980-1990	No	No
Yes	No	Yes	father		never	No	2001-2005	Yes	No
No	No	No	mother	No	never	No	1980-1990	No	No
Yes	Yes	Yes	father	Yes	sometimes	No	after 2006	Yes	Yes
Yes	No	Yes	mother	Yes	sometimes	No	2001-2005	Yes	Yes
No	No	Yes	mother	Yes	never	No	2001-2005	Yes	Yes
No	Yes	Yes	mother	No	never	No	1980-1990	Yes	No
Yes	Yes	No	father	Yes	never	No	2001-2005	Yes	No
No	No	No	mother	No	sometimes	No	1991-2000	No	Yes
No	Yes	No	mother	No	never	No	2001-2005	Yes	No
No	No	No	mother	No	never	No	1991-2000	Yes	No
Yes	No	No	father	No	never	Yes	after 2006	Yes	No
Yes	No	No	mother	Yes	never		2001-2005	Yes	No
No	No	No	mother	No	never	No	1980-1990	Yes	No
Yes	Yes	Yes	mother	Yes	never	No	1991-2000	No	Yes
No	No	Yes	mother		never	No	after 2006	No	Yes
Yes	No	Yes	mother	No	never	No	2001-2005	Yes	Yes
Yes	No	No	mother	Yes	never	No	1991-2000	Yes	No
No	No	No	father	No	never	No	1980-1990	No	No
Yes	Yes	No	mother	No	never	No	1991-2000	No	No
Yes	No	Yes	mother	Yes	sometimes	No	2001-2005	Yes	No
Yes	Yes	Yes	father	Yes	never	No	1991-2000	No	No
Yes	No	No	mother	No	sometimes	No	1991-2000	Yes	No
Yes	No	Yes	mother	Yes	never	No	1991-2000	Yes	No
Yes	No	Yes	mother		never		1991-2000	Yes	No
Yes	Yes	Yes	mother	Yes	never	No	1991-2000	Yes	No
Yes	Yes	Yes	mother	Yes	never	No	1980-1990	No	Yes
Yes	Yes	Yes	mother	No		No	1991-2000	No	Yes
Yes	No	No	father	No	never	No	1991-2000	Yes	Yes
Yes	No	Yes	mother	Yes	never	No	2001-2005	Yes	No
Yes	Yes	Yes	mother	No	never	Yes	1991-2000	No	No
Yes	No	No	others	No	never	No	after 2006	Yes	Yes
No	No	No	Yes2	No	never		1991-2000	No	Yes
Yes	Yes	Yes	mother	Yes	sometimes	No	2001-2005	Yes	No
Yes	No	No	mother	Yes	never	Yes	2001-2005	No	Yes
No	No	No	mother	No	never	No	1980-1990	Yes	No
Yes	No	No	mother	No	never	No	2001-2005	Yes	Yes
Yes	No	No	mother	No	never	No	after 2006	Yes	No
Yes	Yes	No	mother	No	never	Yes	2001-2005	Yes	Yes
Yes	No	Yes	mother	No	sometimes	No	after 2006	Yes	No
No	Yes	No	father	Yes	never	No	after 2006	Yes	No
Yes	Yes	Yes	mother	No	never	No	after 2006	Yes	Yes
No	No	No	mother	Yes	never	No	before 1980	Yes	No
No	No	Yes	father	No	sometimes	No	2001-2005	Yes	Yes
Yes	No	Yes	father	No	sometimes	No	2001-2005	Yes	No
No	No	No	mother	Yes	always	No	2001-2005	Yes	Yes
No	No	Yes	mother	No	sometimes	No	2001-2005	Yes	No
Yes	No	Yes	mother	No	always	No	after 2006	Yes	Yes
No	No	Yes	mother	No		No	after 2006	Yes	Yes
No	No	Yes	mother	No	never	No	2001-2005	Yes	Yes
No	No	Yes	mother	No	never	No	after 2006	Yes	Yes
No	No	No	mother		sometimes	No	2001-2005	Yes	Yes
Yes	No	Yes	mother	Yes	never	Yes	2001-2005	Yes	No
No	No	No	father	Yes	sometimes	No	2001-2005	Yes	No
No	Yes	Yes	father	No	never	No	2001-2005	Yes	No
Yes	Yes	Yes	mother	Yes	never	No	before 1980	Yes	No
No	No	No	Yes2	No	always	No	1980-1990	Yes	Yes
No	Yes	Yes	mother	No	never	No	2001-2005	No	No
No	No	Yes	father	No	never	No	1991-2000	Yes	Yes
No	Yes	Yes	mother	Yes	sometimes	No	2001-2005	No	Yes
No	No	No	mother	Yes	never	No	2001-2005	Yes	Yes
No	Yes	Yes	mother	No	never	No	2001-2005	Yes	Yes
No	No	Yes	mother		never	No	2001-2005	No	Yes
Yes	Yes	Yes	mother	Yes	never	No	2001-2005	Yes	No
No	No	Yes	mother	No	always	No	2001-2005	Yes	No
No	No	No	father	No	never	No	2001-2005	Yes	No
Yes	Yes	No	mother	No	never	No	2001-2005	Yes	No
No	No	No	mother		always	No	2001-2005	No	Yes
Yes	No	Yes	father	Yes	sometimes	No	2001-2005	Yes	No
Yes	No	No	mother	Yes	always	No	after 2006	Yes	Yes
No	No	Yes	mother	Yes	sometimes	No	1980-1990	No	No
No	No	Yes	mother	Yes	sometimes	No		Yes	Yes
No	No	Yes	mother	Yes	never	Yes	1991-2000	No	Yes
No	No	No	mother		never	No	2001-2005	Yes	No
No	No	No	mother	Yes	sometimes	No	1991-2000	No	No
No	No	Yes	father	Yes	sometimes	No	after 2006	Yes	Yes
No	No	No	mother	No	never	No	1991-2000	Yes	No
No	No	No	mother	No	never	No	1991-2000	No	No
No	Yes	No	mother	No	never	No	1991-2000	Yes	No
No	No	No	mother	Yes	never	No	after 2006	Yes	No
No	No	No	mother	Yes	never	No	1980-1990	Yes	Yes
No	No	No	mother	No	never	No	after 2006	No	No
Yes	Yes	Yes	mother	No	never	No	after 2006	Yes	Yes
No	No	No	mother	No	never	Yes	1991-2000	Yes	No
No	No	No	mother	No	always	No	2001-2005	Yes	No
No	No	No	mother	No	never	No	2001-2005	Yes	Yes
No	No	No	mother	No	sometimes	No	1980-1990	Yes	No
No	No	No	father	No	never	Yes	1991-2000	No	No
No	No	No	mother	Yes	never	No	1980-1990	No	Yes
No	No	No	mother	No	never	No	2001-2005	Yes	Yes
No	No	No	mother		never	No	2001-2005	Yes	Yes
No	Yes	Yes	mother	Yes	never	Yes	2001-2005	No	Yes
No	No	No	mother	Yes	never	No	2001-2005	Yes	No
No	No	No	mother	Yes	sometimes	No	1991-2000	Yes	No
No	No	Yes	mother	No	sometimes	No	2001-2005	No	No
No	No	No	mother	No	never	No	after 2006	No	No
No	No	No	father	No	never	No	after 2006	No	No
No	Yes	No	others	No	never	No	2001-2005	No	Yes
No	No	No	father	No	never	No	2001-2005	Yes	Yes
No	No	No	mother		sometimes	No	1991-2000	Yes	No
No	No	No	mother	No	never		2001-2005	Yes	No
No	No	No	mother	No	never	No	after 2006	Yes	Yes
No	No	No	grandmother	Yes	never	No	2001-2005	Yes	No
No	No	No	father	No	never	No	2001-2005	No	Yes
No	Yes	Yes	mother	Yes	sometimes	No	2001-2005	Yes	No
No	No	Yes	mother	No	never	No	after 2006	Yes	No
No	No	No	mother	No	never	No	2001-2005	No	No
No	No	No	mother	No		No	after 2006	Yes	No
No	No	Yes	mother	Yes	never	No	2001-2005	Yes	No
No	No	No	grandfather	No	never	No	after 2006		Yes
No	No	No	grandmother	Yes	sometimes	No	after 2006		No
No	No	Yes	grandmother	Yes	never	No	1991-2000	Yes	No
No	Yes	Yes	mother	Yes	never	No	after 2006	Yes	No
No	No	No	grandmother	No	sometimes	No	after 2006	Yes	No
No	No	No	mother	No	never	No	after 2006	Yes	No
No	No	No	mother	No	never	No	after 2006	Yes	Yes
No	No	No	mother	No	never	No	after 2006	Yes	No
Yes	No	No	mother	Yes	never	No	after 2006	Yes	No
No	No	No		No	never	No	1991-2000	No	No
No	No	Yes	father	No	never	No	before 1980	No	No
No	No	No	mother	No	never	No	1980-1990	Yes	No
No	Yes	Yes	mother	No	never	No	before 1980	Yes	No
No	Yes	Yes	mother	No	sometimes	No	1991-2000	No	No
No	No	No	mother	Yes		No	2001-2005	Yes	Yes
No	No	No		No	sometimes	No	after 2006	Yes	Yes
No	Yes	Yes	father	No	never	Yes	2001-2005		No
No	No	No	mother	No	never	No	1991-2000	Yes	No
No	No	No	mother	Yes	never	Yes	1991-2000	Yes	Yes
No	Yes	No	father	Yes	never	No	1991-2000	Yes	No
No	No	No	father	No	never	No	2001-2005	Yes
No	No	No	mother	Yes	never	No	before 1980	Yes	No
No	No	No	mother		sometimes	No	1980-1990	Yes	No
No	No	No	father	No	always	Yes	2001-2005	Yes	No
No	No	No	mother	No	never	No	1991-2000	Yes	No
No	No	Yes	mother	No	sometimes		1991-2000	No	No
No	No	Yes	mother		never	No	1991-2000	Yes	Yes
No	No	No		Yes	never	No	1991-2000	Yes	Yes
No	No	Yes	mother	Yes	sometimes	Yes	2001-2005	No	Yes
No	No	No	mother	No	never	No	2001-2005	Yes	No
No	No	No	father		never	No	after 2006	Yes	No
No	No	Yes	mother	Yes	sometimes	No	after 2006	Yes	Yes
No	No	No	father	No	never	Yes	after 2006	Yes	Yes
No	No	No	mother	No	never	No	2001-2005	Yes	Yes
No	Yes	Yes	mother	No	never	No	2001-2005	Yes	Yes
No	No	Yes	mother	No	never	No	after 2006	Yes	Yes
No	No	Yes	Yes2	No	never	No	2001-2005	Yes	Yes
No	No	Yes	mother	No	never	No	after 2006	Yes	Yes
No	No	Yes	father	No	sometimes	No	1991-2000	Yes	No
No	No	No	mother	Yes	sometimes	No	2001-2005	No	Yes
No	No	No	father	No	never	No	2001-2005	Yes	No
No	No	Yes	father	Yes	sometimes	No	1980-1990	Yes	No
No	No	No	mother		never	Yes	after 2006	Yes	Yes
No	No	Yes	mother	No	sometimes	No	1980-1990	Yes	Yes
No	No	No	father	Yes	sometimes	No	1991-2000	No	No
No	No	No	mother	Yes	never	No	1991-2000	Yes	No
No	No	Yes	mother	Yes	never	No	1980-1990	No	Yes
No	Yes	No	grandmother		never	No	before 1980	No	No
No	No	No	father	No	never	No	2001-2005	Yes	Yes
No	Yes	Yes	mother	Yes	sometimes	Yes	after 2006	Yes	No
No	No	No	mother	Yes	sometimes	No	2001-2005	Yes	No
No	Yes	No	father	Yes	sometimes	No	1980-1990	Yes	No
No	No	Yes	mother	Yes	sometimes	Yes	1991-2000	No	No
No	No	No	mother	Yes	never	No	2001-2005	Yes	No
No	No	Yes	father	Yes	sometimes	No	after 2006	Yes	No
No	No	No	father	Yes	never	No	1991-2000	No	Yes
Yes	No	No	father	No	sometimes	No	1991-2000	No	No
No	No	No	mother	No	sometimes	No	1980-1990	Yes	No
No	No	No	father		never	No	after 2006	Yes	No
No	No	No	mother		sometimes	No	after 2006	No	Yes
No	No	No	father	No	never	No	2001-2005	Yes	Yes
No	No	No	mother	Yes	never	No	1991-2000	Yes	No
No	No	No	mother	No	never	Yes	1980-1990	No	Yes
No	No	No	grandmother		sometimes	No	2001-2005	Yes	No
No	Yes	No	mother	No	sometimes	No	2001-2005	Yes	Yes
No	No	No	grandfather	No		No	1991-2000	No	No
No	No	No	mother		sometimes	No	after 2006	Yes	No
No	No	No	mother	No	never	No	after 2006	Yes	No
Yes	No	No	mother		never	No	2001-2005	Yes	Yes
Yes	No	No	mother	Yes	never	No	after 2006	Yes	No
No	Yes	No	mother	Yes	never	No	2001-2005	Yes	No
Yes	No	Yes	mother	Yes	never	No	2001-2005	No	Yes
Yes	No	No	mother	No	never	No	1991-2000	Yes	Yes
No	No	No	father	No	sometimes	No	1991-2000	No	No
Yes	No	No	mother		never		2001-2005	No	Yes
Yes	Yes	Yes	mother		sometimes		after 2006	Yes	No
Yes	No	No	mother		sometimes		after 2006	Yes	Yes
Yes	Yes	Yes	mother	Yes	never		after 2006	Yes	No
Yes	Yes	Yes	mother	Yes	never		after 2006	Yes	No
Yes	No	No	mother		always		2001-2005	Yes	No
Yes	Yes	Yes	mother	Yes	never		after 2006	Yes	Yes
Yes	Yes	Yes	mother	Yes	sometimes		after 2006	Yes	No
No	No	No	mother		never		2001-2005	Yes	No
Yes	No	No	mother	Yes	never		after 2006	Yes	No
Yes	Yes	Yes	mother		sometimes		1991-2000	Yes	Yes
No	Yes	Yes	mother		never		2001-2005	Yes	No
Yes	No	Yes	mother		never		2001-2005	Yes	Yes
No	No	No	father		sometimes		2001-2005	Yes	No
No	No	No	mother		always		after 2006	Yes	Yes
No	No	No	mother		never		2001-2005	Yes	No
No	No	No	father		never		2001-2005	Yes	Yes
No	No	No	father		never		1991-2000	No	Yes
No	No	Yes	mother	Yes	never		2001-2005	Yes	No
No	No	No	mother	Yes	never		after 2006	Yes	No
No	No	No	mother		sometimes		after 2006	Yes	No
No	No	No	grandmother		sometimes		after 2006	Yes	No
No	Yes	Yes	mother	Yes	never	Yes	after 2006	Yes	No
No	No	No	mother	Yes	never		2001-2005	Yes	No
No	Yes	Yes	Yes2		never		after 2006	Yes	No
No	No	No	grandfather		never	Yes	after 2006	Yes	No
No	Yes	No	mother				1991-2000	Yes	Yes
Yes	No	No	mother		never		1991-2000	Yes	Yes
No	No	No	mother		never	Yes	after 2006	Yes	Yes
No	No	No	mother		never		2001-2005	Yes	Yes
Yes	Yes	Yes		Yes	always	No	after 2006	Yes	Yes
No	No	No	mother			No			Yes
No	No	No	mother	No	never	No	1980-1990	Yes	No
No	No	Yes	mother	Yes	sometimes	No	2001-2005	Yes	Yes
No	Yes	No	mother	Yes	sometimes	No	1980-1990	Yes	No
No	No	No	mother	Yes	never	No	2001-2005	Yes	No
No	No	No	grandmother	No	sometimes	No	2001-2005	Yes	No
No	No	No	mother	No	sometimes	No	after 2006	Yes	No
No	No	No	mother				before 1980		Yes
Yes	No	No	mother		sometimes	No			Yes
Yes	Yes	No	mother	No		No	2001-2005	Yes	No
Yes	No	Yes	mother	No	sometimes	No	2001-2005	Yes	No
Yes	Yes	Yes	mother	No	sometimes	No	2001-2005	Yes	Yes
Yes	No	No	mother	No	never	Yes	before 1980	No	No
Yes	No	No	mother	No		Yes	after 2006	Yes	Yes
No	No	No	mother	No		No	2001-2005	Yes	No
No	No	No	mother		sometimes	No	after 2006	Yes	Yes
No	No	No	grandfather	Yes	sometimes		1991-2000	Yes	Yes
No	Yes	No	grandfather	Yes	sometimes	Yes	after 2006	Yes	Yes
No	No	No	mother	Yes	never	No	2001-2005	No	No
Yes	No	No	mother	Yes	sometimes	No	2001-2005	No	Yes
No	No	No	mother	No	never	No	2001-2005	Yes	No
No	No	No	mother	Yes	never		after 2006	Yes	Yes
No	No	No	grandmother	Yes		Yes	2001-2005	Yes	Yes
Yes	Yes	No	mother	Yes	sometimes	No	1991-2000	No	No
No	No	No	mother		never	No			No
No	Yes	Yes	mother	No	never	No	2001-2005	No	Yes
No	No	No	mother	Yes	never	No	after 2006	Yes	No
Yes	Yes	Yes	mother	Yes	never	Yes	1991-2000	Yes	Yes
No	No	No	father	No		No	2001-2005	Yes	Yes
No	No	No	mother	No	never	Yes		No	Yes
No	Yes	Yes	father	No	never	No	after 2006	Yes	Yes
No	No	Yes	mother	No	sometimes	No	1991-2000	No	No
No	No	No	father	Yes	always	No	2001-2005	Yes	Yes
No	No	No	mother		never	No	2001-2005	Yes	No
No	No	No	mother	No	never	No	after 2006	Yes	Yes
No	No	No	father	No	never	No	1980-1990	No	Yes
No	No	No	mother	No	never		1980-1990	No	Yes
No	No	No	grandfather		sometimes	No	1991-2000	Yes	Yes
No	No	No	mother	No	sometimes	No	after 2006	No	Yes
No	No	Yes	grandfather	No	always	No	1980-1990	Yes	Yes
Yes	No	Yes	mother		sometimes		after 2006	No	Yes
Yes	Yes	Yes	mother		never	Yes	after 2006	Yes	No
No	No	No	mother		never		2001-2005	Yes	Yes
No	No	No	grandmother	No	never	No	2001-2005	Yes	Yes
No	No	No	father	No	never	No	before 1980	No	Yes
Yes	Yes	Yes	mother	No	never	No	after 2006	Yes	No
Yes	Yes	Yes	mother	No		Yes	2001-2005	Yes	No
Yes	Yes	Yes	mother	Yes	never	No	2001-2005	Yes	Yes
Yes	Yes	Yes	mother	No	sometimes	No	1980-1990	No	Yes
Yes	Yes	Yes	father	No	always	No	1991-2000	No	No
Yes	Yes	Yes	father	No	always	No	1991-2000	No	Yes
No	Yes	No	father	Yes	sometimes	No	after 2006	Yes	No
Yes	Yes	Yes	father	No	never	No	1991-2000	No	No
No	No	Yes	father	No	never	No	2001-2005	Yes	Yes
No	No	No	mother	No	never	Yes	2001-2005	Yes	No
No	No	No	mother	No	never	No	2001-2005	Yes	No
No	No	No	mother		never		1980-1990	Yes	No
No	No	No	mother		always		1991-2000	Yes	No
No	Yes	No	mother	No	sometimes	No	1991-2000	No	No
No	No	No	mother	No	sometimes	No	2001-2005	No	Yes
Yes	No	No	mother	No		No	1991-2000	No	Yes
No	No	No	grandfather	No		No	after 2006		No
No	No	No	mother	No	never	No	1991-2000	Yes	No
No	Yes	No	grandmother	No	never	No	2001-2005	Yes	No
No	No	No	mother		never	No	2001-2005	Yes	No
No	No	Yes	mother	Yes	sometimes	No	after 2006	Yes	Yes
No	No	Yes	mother	Yes	never	No	2001-2005	Yes	No
No	No	No	father	No		No	1991-2000	Yes	Yes
No	No	No	mother	Yes	sometimes	No	2001-2005	Yes	No
No	No	No		No	sometimes	No	2001-2005	Yes	No
No	No	No	mother	Yes		No	1991-2000	Yes	No
No	No	No	father	No	never	No	1991-2000	Yes	No
No	Yes	Yes	father	No	never	Yes	1980-1990	No	No
Yes	Yes	Yes		Yes	never		after 2006	Yes	No
No	No	No	mother	Yes		Yes	2001-2005	Yes	Yes
No	No	No	mother	Yes	never	No	2001-2005	Yes	Yes
No	Yes	No	father		never		2001-2005	No	Yes
No	No	No	mother		always		after 2006	No	Yes
Yes	Yes	Yes	mother	Yes	never		2001-2005	No	Yes
No	No	No	mother	No	sometimes	Yes	1991-2000	Yes	Yes
No	No	No	grandfather	No		Yes	2001-2005	Yes	No
No	Yes	No	grandmother	Yes	sometimes	No	1980-1990	Yes
No	No	No	grandmother	No	never	No		No	Yes
No	No	No	father	No	never	No	2001-2005	Yes	No
Yes	Yes	Yes	mother	No	never		2001-2005	Yes	Yes
No	No	Yes	mother	No			1991-2000	No
No	No	No	mother	Yes			1991-2000	No
No	No	No	mother
No	No	No	father
No	No	No	mother
No	No	No	mother
No	No	No	mother
No	No	No	mother
No	No	No	mother
No	No	No	mother
No	No	No	mother
No	No	No	mother
No	No	No	mother
No	No	No	mother
No	No	No	father
No	No	No	mother
No	No	No	mother
No	No	No	father
No	No	No	father
No	No	No	mother
No	No	No	father
No	No	No	mother
No	No	No	mother
No	No	No	mother
No	No	No	mother
No	No	No	father
No	No	Yes	others	No	never	No	after 2006	No	Yes
No	Yes	Yes	father	No	never	No	before 1980	Yes	No
Yes	No	Yes	mother	No	sometimes	No	before 1980	No	Yes
Yes	Yes	No	mother	No	sometimes	Yes	2001-2005	Yes	Yes
Yes	No	Yes	mother	Yes	never	No	after 2006	Yes	Yes
Yes	No	No	Yes2	No	never	No	1991-2000	No	Yes
Yes	Yes	Yes	mother	Yes	never	No	1980-1990	No	Yes
No	Yes	No	mother	No		Yes	1991-2000	No	Yes
Yes	No	No	mother	Yes	never	No	1980-1990	Yes	Yes
No	No	Yes	mother	Yes	never	No	2001-2005	Yes	No
No	No	No	mother	No	never	No	before 1980	No	No
Yes	No	Yes	others		sometimes	No	after 2006	No	Yes
No	No	No	mother	No	never	No	after 2006	Yes	No
No	No	No	mother	Yes	never	No	after 2006	Yes	No
No	No	No	mother	Yes	never	No	2001-2005	Yes	Yes
No	No	Yes	mother	Yes	sometimes	No	1991-2000	Yes	Yes
No	No	No	grandmother		sometimes	No	1991-2000	Yes	Yes
No	No	No	mother	Yes		No	1991-2000	Yes	Yes
No	No	No	father	Yes		No	1991-2000	No	Yes
Yes	Yes	No	mother	Yes	never		2001-2005	Yes	Yes
Yes	Yes	Yes	mother	Yes	sometimes	No	1991-2000	Yes	No
Yes	Yes	Yes	mother	Yes	always	No	after 2006	Yes	Yes
Yes	No	No	mother	No	never	No	1991-2000	No	Yes
Yes	No	No	mother	No	sometimes	No	before 1980	No	Yes
Yes	No	Yes	mother	No	never	Yes	2001-2005	Yes	No
Yes	Yes	No	mother	Yes	never	No	after 2006	No	No
Yes	Yes	Yes	mother	No	never	No	1991-2000	Yes	Yes
Yes	No	Yes	mother	No	always	Yes	1991-2000	Yes	No
No	Yes	No	mother	Yes	sometimes	No	after 2006	Yes	Yes
No	No	No	mother	No	never	No	after 2006	Yes	No
No	No	No	mother	Yes	never	No	1980-1990	No	No
No	Yes	No	mother	Yes	always	No	after 2006	Yes	No
No	Yes	Yes	mother	No	never	No		No	Yes
No	No	Yes	mother	No	sometimes	No	1991-2000	Yes	No
No	Yes	No	father	Yes	sometimes	No	after 2006	Yes	Yes
No	No	Yes		No	always	Yes	2001-2005	No	No
No	No	No	father	No	sometimes	No	2001-2005	No	No
Yes	Yes	No	grandmother	No	never	No	2001-2005	Yes	No
No	Yes	No	mother	No	never	No	1991-2000	Yes	Yes
No	No	No	mother	No	never	No	after 2006	No	Yes
Yes	Yes	Yes	mother	No	never	No	1991-2000	No	Yes
Yes	Yes	Yes	mother		never		2001-2005	Yes	No
Yes	Yes	Yes	mother	Asthma	sometimes		after 2006	No	Yes
No	No	No	mother		never		1991-2000	No	No
Yes	Yes	Yes	mother	No	sometimes	Yes	2001-2005	No	Yes
Yes	Yes	Yes	father	No	never	No	2001-2005	No	Yes
No	Yes	Yes	mother	Yes	never	No	1980-1990	No	Yes
Yes	Yes	Yes	mother	Yes	never	No	2001-2005	Yes	No
Yes	Yes	No	mother	No	never	No	after 2006	Yes	No
Yes	No	Yes		Yes	never	No	after 2006	Yes	Yes
Yes	Yes	Yes	mother	Yes			1980-1990	No	No
Yes	No	Yes	father	Yes	never	No	1991-2000	Yes	No
Yes	Yes	Yes	mother	Yes	always	No	1991-2000	Yes	No
No	Yes	Yes	mother	No	never	No	1991-2000	Yes	Yes
Yes	Yes	Yes	father	No	never	No	before 1980	No	No
No	No	No	mother	No	never	Yes	1991-2000	No	Yes
No	Yes	No	father	No	never	No	1991-2000	Yes	Yes
Yes	No	Yes	mother	Yes	never	No	2001-2005	Yes	Yes
No	No	No	grandmother	No	never	No	after 2006	Yes	No
Yes	Yes	No	father	No	never	No	2001-2005	Yes	Yes
No	No	No	mother	No	sometimes	No	2001-2005	No	Yes
No	Yes	No	mother	Yes	never	Yes	2001-2005	Yes	Yes
No	No	No	mother	No	never	No	before 1980	No	Yes
No	Yes	Yes	mother	No	never	No	2001-2005	Yes	Yes
No	No	No	mother	Yes	never	No	1991-2000	No	Yes
No	No	No		No	never	No	after 2006	Yes	Yes
Yes	Yes	Yes	mother	Yes	never	No	1991-2000	No	No
No	No	No	mother	Yes	always		after 2006	No	Yes
Yes	No	No	mother		never		1980-1990	Yes	Yes
No	No	No	mother	Yes		No	after 2006	No	Yes
No	Yes	No	father	Yes	sometimes	No	1980-1990	Yes	No
Yes	Yes	Yes	mother	Yes	sometimes	No	1980-1990	Yes	Yes
Yes	No	Yes	mother	No	never	No	after 2006	No	Yes
Yes	Yes	Yes	mother	No	sometimes	No	after 2006	Yes	Yes
No	Yes	No	mother	No	sometimes	No	1980-1990	Yes	No
Yes	Yes	Yes	mother	Yes	never	No	after 2006	No	Yes
Yes	Yes	Yes	others	Yes	sometimes	No	2001-2005	Yes	No
Yes	Yes	Yes	mother	No	never	No	after 2006	Yes	Yes
No	Yes	Yes	mother	Yes	never	No	after 2006	Yes	Yes
No	No	No	mother	Yes	never	No	1991-2000	Yes	No
No	No	No	father	Yes	sometimes	No	after 2006	Yes	No
No	No	No	father	Yes	sometimes	No	after 2006	Yes	No
No	No	No	mother	No	never	No		Yes	Yes
No	No	No	mother	Yes	sometimes	No	after 2006	Yes	Yes
No	No	No	others	No		No	1991-2000	Yes	Yes
Yes	No	No	mother	Yes	never	Yes	1991-2000	Yes	Yes
No	No	No	mother	No	sometimes	No	1980-1990	No	Yes
No	No	No	mother	No	never	No	after 2006	Yes	Yes
Yes	Yes	Yes	mother	No	never	No	after 2006	Yes	No
Yes	No	Yes	mother	No	always	No	2001-2005	Yes	Yes
Yes	No	No	mother	Yes	never	No	1991-2000	Yes	Yes
Yes	Yes	No	mother	No	never	No	2001-2005	Yes	No
Yes	Yes	Yes	mother	No	sometimes	No	1991-2000	Yes	Yes
Yes	Yes	Yes	father	Yes	sometimes	No	1991-2000	No	No
Yes	No	Yes	mother	No	never	No	2001-2005	Yes	Yes
No	Yes	Yes	father	No	never	No	2001-2005	Yes	Yes
Yes	No	Yes	mother	No	always	No	1991-2000	Yes	No
Yes	No	No	father	Yes	never	No	2001-2005	Yes	No
No	No	Yes	mother	No	never	No	2001-2005	Yes	Yes
No	No	Yes	mother	Yes	never	Yes	after 2006	Yes	No
Yes	No	Yes	mother	Yes	never	No	1991-2000	No	Yes
Yes	Yes	Yes	mother	Yes	always	Yes	after 2006	Yes	Yes
No	Yes	No	mother	Yes	never	No	1991-2000	Yes	Yes
No	No	No	mother	No	sometimes	No	2001-2005	Yes	Yes
No	No	No	mother		never	No	1980-1990	No	Yes
No	No	Yes	mother	Yes	never	No	after 2006	Yes	No
No	No	No	mother	Yes	never	No	2001-2005	Yes	Yes
No	No	Yes	father	Yes	sometimes	No	1991-2000	Yes	Yes
No	No	No	mother	No	never	No	2001-2005	No	Yes
Yes	Yes	Yes	mother		sometimes		2001-2005	Yes	Yes
Yes	No	Yes	mother	Yes	never		1991-2000	Yes	Yes
No	No	No	father		never		2001-2005	Yes	Yes
Yes	Yes	No	mother	No	sometimes	No	1991-2000	No	Yes
Yes	Yes	Yes	mother	No	never	No	1980-1990	No	Yes
Yes	Yes	Yes	father	Yes	never	No	after 2006	No	Yes
No	No	No	mother	No	never	No	1991-2000	Yes	Yes
Yes	Yes	No	others	No	never	Yes	after 2006	Yes	Yes
Yes	No	No	mother	No	never	No	2001-2005	Yes	No
Yes	No	No	mother	No	never	No	1991-2000	No	Yes
Yes	Yes	Yes	mother	No	never	No	1991-2000	No	No
Yes	No	No	mother	No	sometimes	No	after 2006	Yes	Yes
Yes	Yes	Yes	mother	No	always	No	1991-2000	Yes	Yes
Yes	Yes	Yes	mother	No	never	No	1991-2000	Yes	Yes
Yes	Yes	Yes	mother	No	never	Yes	2001-2005	Yes	Yes
Yes	Yes	No	mother	No	never	No	2001-2005	Yes	Yes
Yes	No	Yes	mother	No	never	No	2001-2005	No	No
Yes	Yes	Yes	mother	No	never	Yes	after 2006	Yes	No
No	No	Yes	mother	No	never	No	2001-2005	Yes	Yes
Yes	Yes	Yes	mother	Yes	sometimes	Yes	1991-2000	No	Yes
Yes	Yes	No	father			No	2001-2005	No	Yes
No	No	Yes	mother	No	never	No	2001-2005	No	Yes
Yes	No	Yes	father	No	never	No	2001-2005	Yes	Yes
Yes	Yes	Yes	mother	No	never	No	after 2006	Yes	Yes
No	No	No	mother	No	never	No	2001-2005	Yes	No
No	Yes	No	father	No	sometimes	No	2001-2005	Yes	Yes
No	No	No	mother	No	sometimes	No	2001-2005	No	Yes
No	Yes	Yes		Yes	never	No	1980-1990	Yes	No
Yes	Yes	No	father	Yes	never	No	1991-2000	No	Yes
Yes	Yes	Yes	mother	No	never	No	after 2006	No	Yes
No	No	No	mother	Yes	sometimes	No	after 2006	No	Yes
No	No	Yes	mother		never	No	2001-2005	Yes	Yes
No	No	No	father	Yes	sometimes	No	1991-2000	Yes	No
No	No	No	mother	No	never	No	2001-2005	Yes	No
No	Yes	Yes	mother	No	always	No	2001-2005	Yes	No
No	No	No	mother	No		No	1980-1990	No	Yes
No	No	Yes	mother	No	never	No	1991-2000	No	Yes
No	No	No	mother		never	No	2001-2005	No	No
No	No	No	mother			No	after 2006	Yes	No
No	No	Yes	father		never	No	after 2006	Yes	No
No	No	No	father	No	never	No	after 2006	Yes	Yes
No	No	No		No		No	after 2006	Yes	No
No	No	No	mother	Yes	never	No	1991-2000	No	Yes
No	No	No	mother	No	sometimes	No	1980-1990	Yes	Yes
No	No	No	mother	No	never	No	before 1980	Yes	Yes
No	No	No	father	Yes	always	No	2001-2005	Yes	No
No	No	No	others	No	sometimes	No	before 1980	No	No
No	No	No	grandfather	No	never	No	1991-2000	Yes	No
No	No	No	mother	Yes	never	No	after 2006	No	Yes
No	No	No	mother	No	sometimes	No	before 1980	No	Yes
No	No	No	mother	Yes	never	No	2001-2005	No	Yes
No	No	No	mother	No		No	after 2006	Yes	Yes
No	Yes	Yes	mother	Yes	never	No	2001-2005	Yes	Yes
Yes	No	No	mother	Yes	never	No	1991-2000	No	Yes
No	No	No	mother	No	never	No	after 2006	Yes	No
No	No	Yes	mother	No	sometimes	No	1991-2000	Yes	No
No	Yes	Yes	mother	No	sometimes	No	1980-1990	Yes	Yes
No	No	Yes	mother	Yes	sometimes	No	2001-2005	Yes	No
No	No	No			sometimes	No	2001-2005	Yes	Yes
No	No	No	father	No	sometimes	No	after 2006	No	Yes
Yes	Yes	Yes	mother		never		1980-1990	No	No
No	Yes	Yes	mother		never		2001-2005	No	Yes
Yes	No	Yes	mother	Yes	never	No	1980-1990	No	Yes
No	No	Yes	mother		never		after 2006	Yes	No
Yes	Yes	Yes	mother	Yes	sometimes	No	1980-1990	No	Yes
Yes	No	No	mother	No	never	No	1980-1990	Yes	No
No	No	No	mother	No	never	No	1991-2000	Yes	Yes
No	No	No	mother	Yes	sometimes	No	2001-2005	Yes	No
Yes	No	No	mother	No	never	Yes	2001-2005	Yes	No
Yes	Yes	Yes	mother	No	sometimes	No	1980-1990	No	No
Yes	No	No	mother	No	never	No	1991-2000	Yes	Yes
Yes	Yes	Yes	mother	Yes	never	No	2001-2005	Yes	Yes
Yes	No	No	mother	No	never	No	2001-2005	Yes	No
Yes	No	Yes	mother	No	never	Yes	2001-2005	Yes	Yes
Yes	Yes	Yes	father	Yes	never	No	after 2006	Yes	Yes
Yes	Yes	Yes	mother	Yes	never	No	after 2006	Yes	No
Yes	Yes	Yes	mother	No	never	Yes	1980-1990	No	Yes
Yes	Yes	No	mother	No	always	No	before 1980	No	No
Yes	Yes	Yes	mother	Yes	never	No	2001-2005	Yes	Yes
Yes	Yes	Yes	mother	No	never	No	2001-2005	Yes	No
Yes	Yes	Yes	mother	No	never	Yes	2001-2005	Yes	Yes
Yes	Yes	Yes	father	No	never	No	1991-2000	Yes	No
Yes	No	No	mother	No	always	No	1991-2000	Yes	No
Yes	No	Yes	mother		never	No	2001-2005	No	Yes
Yes	No	Yes	mother	Yes	sometimes	Yes	1991-2000	No	Yes
Yes	No	No	mother	No	never	No	1991-2000	Yes	Yes
Yes	No	No	mother	No	never	No	2001-2005	No	No
Yes	Yes	No	mother	No	never	No	1991-2000	No	Yes
No	Yes	No	mother	Yes	never	No	1991-2000	No	Yes
Yes	Yes	Yes	father	No	never	No	2001-2005	Yes	No
Yes	Yes	Yes	mother	Yes	never	No	1991-2000	No	No
Yes	Yes	Yes	mother	Yes	never	No	after 2006	Yes	No
Yes	Yes	Yes	father	Yes	sometimes	No	1980-1990	No	No
Yes	Yes	Yes	mother	Yes	always	No	1980-1990		No
Yes	Yes	Yes	mother	Yes	never	No	after 2006	No	No
Yes	No	No	grandmother	No	sometimes	No	1991-2000	Yes	Yes
Yes	No	No	father	Yes	never	No	1991-2000	No	Yes
Yes	No	Yes	mother	No	never	No	1980-1990	No	Yes
Yes	Yes	Yes	mother	Yes	never	No	2001-2005	Yes	Yes
Yes	No	No	others	No	never	No	after 2006	Yes	Yes
No	No	Yes	mother		never		2001-2005	Yes	7
Yes	Yes	Yes	mother		sometimes	Yes	2001-2005	Yes	No
No	No	No	mother	No	never	No	after 2006	Yes	No
Yes	Yes	Yes	mother	Yes	never	No	1991-2000	Yes	Yes
Yes	No	No	mother	No	never	Yes	2001-2005	Yes	Yes
Yes	Yes	Yes	father	No	never	No	1991-2000	Yes	No
No	No	No	father	Yes	sometimes	No	after 2006	Yes	Yes
No	No	No	mother	Yes	never	Yes	after 2006	Yes	No
Yes	No	No	mother	Yes	never	No	before 1980	No	Yes
Yes	No	Yes	mother	No	sometimes	No	2001-2005	Yes	No
No	No	Yes	mother	No	never	No	1980-1990	Yes	No
No	No	Yes	mother	No	never	No	2001-2005	Yes	No
No	Yes	No	mother	No	never	No	1991-2000	No	Yes
No	No	No	grandmother			Yes	2001-2005	Yes	No
No	No	No	mother	No	never	Yes	2001-2005	Yes	No
No	No	No	mother	Yes	sometimes	No	after 2006	Yes	No
No	No	Yes	mother		never	No	2001-2005	Yes	Yes
Yes	Yes	No	mother	Yes	never	No	2001-2005	No	Yes
No	No	No	mother	Yes	always	Yes	1980-1990	Yes	Yes
No	Yes	No	mother	Yes	sometimes	No	1980-1990	Yes	Yes
No	No	No	mother	Yes	never	No	1991-2000	Yes	No
No	No	No	mother	No	never	Yes	2001-2005	Yes	No
Yes	No	No	mother	No	sometimes	No	2001-2005	Yes	Yes
Yes	No	No	mother	Yes	never	No	before 1980	Yes	Yes
Yes	Yes	Yes	mother	Yes	never	No	2001-2005	Yes	Yes
No	No	No	mother	Yes	never	No	after 2006	Yes	Yes
Yes	Yes	Yes	mother	Yes	sometimes	No	1980-1990	No	No
No	Yes	Yes	mother	No	never	No	2001-2005	Yes	No
No	No	Yes	mother	Yes	never	No	2001-2005	Yes	No
Yes	Yes	No	mother	Yes	never	Yes	1980-1990	Yes	No
No	No	Yes	mother	No	never	No	1991-2000	No	No
No	Yes	Yes	grandmother	Yes	sometimes	No	before 1980	No	No
No	Yes	Yes	mother	No	sometimes	No	1980-1990	No	Yes
Yes	Yes	No	mother	No	sometimes	No	1991-2000	Yes	Yes
No	Yes	Yes	mother	No	never	No	before 1980	No	Yes
Yes	Yes	Yes	mother	No	never	Yes	2001-2005	Yes	No
No	No	No	mother	No	never	No	2001-2005	No	Yes
No	No	No	grandfather	Yes	always	No	after 2006	Yes	No
No	No	Yes	mother	Yes	sometimes	No	1991-2000	No	No
No	No	Yes	mother		never	Yes	2001-2005	Yes	Yes
No	No	No	grandmother	Yes	sometimes	No	1991-2000	Yes	Yes
No	No	No	mother	Yes	never	No	1980-1990	Yes	Yes
No	No	No	mother	No	never	No	2001-2005	Yes	No
No	No	Yes	mother	No	never	No	2001-2005	No	No
No	No	No	mother	No	never	No	after 2006	Yes	Yes
No	No	No	mother	No	never	No	2001-2005	Yes	No
No	No	No		No	sometimes	No	before 1980	No	Yes
No	No	No	mother	No	always	No	1991-2000	No	Yes
No	No	No	mother	Yes	never	No	1991-2000	Yes	Yes
No	No	No	father		sometimes	No	1991-2000	Yes	Yes
No	No	No	mother	No	sometimes	No	1980-1990	No	No
No	No	Yes	mother	No	never	No	1980-1990	No	Yes
No	No	No	mother	No	never	No		No	Yes
No	No	No	father	No	sometimes	No	1980-1990	Yes	Yes
No	No	No	father	No	sometimes	No	2001-2005	Yes	No
No	Yes	Yes	mother	No	never	No	2001-2005	Yes	No
No	No	No	mother	No	sometimes	Yes	2001-2005	Yes	Yes
No	No	No	grandmother	No	sometimes	No	after 2006	No	No
No	No	Yes	mother	No	sometimes	No	2001-2005	Yes	Yes
No	No	No	father	No	never	No	2001-2005	Yes	No
No	No	Yes	father	No	never	Yes	2001-2005	Yes	No
No	Yes	No	mother	Yes	never	No	after 2006	Yes	Yes
No	No	Yes	mother	No	sometimes	No	2001-2005	Yes	No
No	No	No	father	No	never	No	2001-2005	Yes	No
No	No	No	mother	No	never	No	after 2006	Yes	Yes
No	No	No	mother	No	never	No	after 2006	Yes	Yes
No	No	No	mother	No	never	No	after 2006	Yes	Yes
No	No	No	mother	Yes	never	No	after 2006	Yes	Yes
Yes	Yes	No	father		never	No	after 2006	Yes	Yes
No	No	No	father	Yes	never	No	after 2006	Yes	Yes
No	Yes	No	father	No	never	No	after 2006	Yes	No
No	No	No	others	No	never	No	after 2006	Yes	No
No	No	Yes	mother	Yes	never	Yes	before 1980		Yes
No	No	Yes	mother		never	No	1991-2000	Yes	Yes
No	No	No	mother	No	sometimes	No	1980-1990	Yes	No
Yes	No	No	mother		never	No			Yes
No	No	No	mother	No	sometimes	Yes		No	Yes
No	Yes	No	mother	No	never	Yes	2001-2005	Yes	Yes
No	No	No	mother	No	never	No	2001-2005	No	No
No	No	No	mother	No	never	No	2001-2005		Yes
No	No	No	grandfather	Yes	always	No	1991-2000	Yes	No
No	Yes	No	mother	No	never	No	2001-2005	Yes	Yes
No	Yes	No	mother		never	No	after 2006	No	No
No	No	Yes	grandfather	Yes	never	No	1991-2000	No	No
No	No	No	mother	No	always	No	after 2006		Yes
No	Yes	No	father	Yes	never	No	2001-2005	Yes	Yes
No	No	No	mother		never	No	after 2006	Yes	No
No	No	No	father	No	never	No	after 2006	Yes	No
No	No	No	father	Yes	never	No	1991-2000	Yes	No
No	Yes	Yes	others	No	always	Yes	2001-2005	No	No
No	No	No	mother	No	never	No	1991-2000	No	No
No	No	No	mother	No	never	No	2001-2005	Yes	Yes
No	No	No	mother	No	never	Yes	before 1980	Yes	Yes
No	No	No	grandmother	Yes		No	1991-2000	Yes	No
No	No	No	mother		never	No		No	No
No	Yes	Yes	mother	Yes	never	No	1980-1990	Yes	No
No	Yes	No	mother	No	never	No	before 1980	No	No
No	Yes	No	mother	No	sometimes	No	1980-1990	Yes	Yes
No	No	Yes	mother	Yes	never	No	2001-2005	No	Yes
No	No	No	mother	No	never	No	1991-2000	No	Yes
No	No	No	father	Yes	sometimes	No	2001-2005	Yes	No
No	No	No	mother	Yes	sometimes	No	2001-2005	Yes	Yes
No	No	No	mother	Yes	sometimes	No	2001-2005	Yes	Yes
No	No	No	mother	No	always	No	2001-2005	Yes	Yes
No	No	No	mother		sometimes	No	1991-2000	Yes	No
No	No	No	mother	No	never	No	after 2006	Yes	No
No	No	Yes	mother	Yes	never	No	2001-2005	Yes	Yes
Yes	Yes	No	father	Yes	never	No		No	Yes
Yes	No	Yes	mother	No	never	No	1991-2000	Yes	Yes
No	No	No	mother	No	always	No	after 2006	Yes	No
No	No	Yes	mother	No	sometimes	No	1980-1990	No	Yes
No	No	No	mother	Yes	sometimes	No	1991-2000	Yes	No
No	No	No	father	No	sometimes	No	2001-2005	No	Yes
Yes	No	Yes	mother	Yes	always	No	1991-2000	Yes	No
No	No	No	mother	No	always	No	before 1980	No	Yes
No	No	No	mother	No	never	No	2001-2005	Yes	No
Yes	No	Yes	mother		never		2001-2005	Yes	Yes
Yes	Yes	Yes	others	Yes	never		2001-2005	No	Yes
Yes	No	No	mother	Yes	never		2001-2005	Yes	No
Yes	Yes	Yes	mother	Yes	never		2001-2005	Yes	Yes
No	No	Yes	father	Yes	never		after 2006	Yes	Yes
Yes	No	No	mother		never		2001-2005	Yes	Yes
Yes	No	No	mother		never		2001-2005	Yes	Yes
No	No	No	mother		never		2001-2005	Yes	Yes
No	Yes	Yes	mother	No	never	No	after 2006	Yes	No
Yes	No	No	mother		never	No	after 2006	Yes	No
No	No	Yes	mother		never		2001-2005	Yes	No
Yes	No	No	father		never		2001-2005	Yes	Yes
No	No	No	mother		never	Yes	after 2006	Yes	No
No	Yes	Yes	mother		sometimes		2001-2005	Yes	No
No	No	Yes	mother		never		after 2006	Yes	Yes
No	No	No	mother	Yes	always	Yes	2001-2005	Yes	No
No	No	No	mother	No	never	No	2001-2005	No	Yes
Yes	Yes	No	mother	No	never	No	1980-1990	No	No
No	No	No		No	never	No	2001-2005	Yes	Yes
No	Yes	Yes	mother	No	never	No	1991-2000	Yes	No
Yes	No	No	mother	Yes	never	No	1991-2000	No	Yes
Yes	Yes	No	father	Yes	never	No	2001-2005	No	Yes
Yes	No	Yes	mother	Yes	never	No	1991-2000	No	Yes
Yes	Yes	Yes		No		No	2001-2005		Yes
Yes	No	Yes	mother	No	never	Yes	before 1980	Yes	No
Yes	No	No	mother	Yes	never	No	after 2006	Yes	Yes
Yes	No	No	mother	No	never	No	1991-2000	Yes	Yes
Yes	Yes	Yes	mother		never	No	2001-2005	No	Yes
Yes	No	Yes	mother	No	never	Yes	1991-2000	Yes	No
Yes	No	No	mother	No	sometimes	No	1991-2000	Yes	Yes
Yes	No	Yes	mother	No	sometimes	No	2001-2005	Yes	Yes
Yes	Yes	Yes	father	No	never	No	2001-2005	Yes	No
Yes	No	Yes	mother	No	never	Yes	2001-2005	Yes	No
Yes	No	Yes	mother	Yes	never	No	1991-2000	Yes	No
Yes	No	Yes	father	No	never	No	after 2006	Yes	Yes
Yes	Yes	No	father	Yes	never	No	after 2006	Yes	No
Yes	Yes	No	Nose/Eye	No	never	Yes	after 2006	Yes	Yes
Yes	No	No	mother	No	never	No	2001-2005	Yes	No
Yes	Yes	Yes	mother	No	never	No	after 2006	Yes	Yes
Yes	Yes	Yes	mother	No	never	Yes	2001-2005	Yes	No
Yes	No	No	mother	No	never	No	1980-1990	Yes	No
Yes	Yes	Yes	mother	Yes	never	No	before 1980	No	No
Yes	No	Yes	mother	No	sometimes	No	2001-2005	Yes	Yes
Yes	No	No	father	No	never		1980-1990	Yes	No
Yes	No	No	mother	Yes	always	Yes	1991-2000	No	Yes
Yes	Yes	Yes	mother	No	never	No	2001-2005	Yes	No
Yes	No	No	grandmother	No	sometimes	No	1980-1990	Yes	Yes
Yes	Yes	Yes	mother	No	sometimes	Yes	2001-2005	Yes	Yes
Yes	Yes	Yes	mother	Yes	never	No	2001-2005	Yes	No
Yes	Yes	Yes	mother	Yes	never	No	after 2006	Yes	No
Yes	No	Yes	mother	No	never	Yes	2001-2005	Yes	No
Yes	Yes	No	mother	Yes	never	No	after 2006	No	Yes
Yes	No	No	father	Yes	never	No	1991-2000	No	No
Yes	Yes	Yes	mother		sometimes	No	2001-2005	No	Yes
Yes	Yes	Yes	mother	Yes	sometimes	No	after 2006	Yes	No
Yes	Yes	Yes	mother	Yes	sometimes	No	1980-1990	No	No
Yes	Yes	Yes	mother	No	never	No	1991-2000	No	Yes
Yes	No	No	mother	No	never	No	1991-2000	No	No
Yes	Yes	No	mother	Yes	never	No	after 2006	Yes	No
Yes	Yes	Yes	mother	No	never	No	2001-2005	Yes	No
Yes	No	Yes	father	No	never	No	1991-2000	No	Yes
Yes	No	Yes	mother	Yes	never	No	2001-2005	Yes	Yes
Yes	No	No	mother		never	Yes	after 2006	No	Yes
No	Yes	No	father	No	never	No	1980-1990	Yes	No
No	Yes	No	mother	No	never	No	1991-2000	No	No
No	No	Yes	mother	No	never	No	after 2006	No	Yes
No	No	Yes	mother	Yes	never	No	after 2006	Yes	No
No	No	No	mother	Yes	never	No	2001-2005	Yes	Yes
Yes	Yes	Yes	mother	Yes	never	No	2001-2005	Yes	Yes
No	Yes	No	mother	No	sometimes	No	2001-2005	Yes	No
No	No	No	mother		never	No	2001-2005	No	No
Yes	Yes	Yes	mother	No	never	No	1991-2000	Yes	No
No	No	No	mother	No	never	No	1980-1990	No	Yes
No	No	Yes	mother	No	never	Yes	2001-2005	Yes	Yes
Yes	Yes	Yes	mother	No	never	No	2001-2005	Yes	Yes
Yes	Yes	Yes	father	No	never	No	1991-2000	Yes	Yes
Yes	Yes	Yes	mother	Yes	never	No	before 1980	No	No
No	No	Yes	mother	Yes	never	No	2001-2005	Yes	No
Yes	Yes	No	mother	Yes	never	No	1980-1990	Yes	No
Yes	No	Yes	mother	No	never	No	1991-2000	Yes	Yes
Yes	Yes	No	mother	No	sometimes	No	1980-1990	No	Yes
No	No	No	mother	No	never	No	2001-2005	Yes	No
No	No	No	mother	Yes	never	No	before 1980	No	No
No	No	No	mother	Yes	always	No	1991-2000	No	Yes
Yes	No	No	father	Yes	never	No	2001-2005	Yes	Yes
Yes	No	Yes	mother	No	never	No	after 2006	Yes	No
No	No	No	others		always	No	after 2006	Yes	No
Yes	Yes	No	mother		never	No	after 2006	Yes	Yes
No	No	Yes	mother	No	never	No	2001-2005	Yes	No
No	No	Yes	mother	No	never	No	2001-2005	Yes	No
No	No	No	mother	No	never	No	1991-2000	Yes	No
No	Yes	Yes	grandfather	Yes	never	No	1991-2000	Yes	Yes
No	No	No	mother	Yes	never	No	after 2006	Yes	No
No	Yes	Yes	mother	No	never	No	2001-2005	Yes	No
Yes	No	Yes	mother	No	never	No	2001-2005	Yes	No
No	No	No	father		never	No	after 2006	Yes	No
No	Yes	No	mother	Yes	never	No	2001-2005	Yes	Yes
Yes	No	No	mother	No	never	No	before 1980	Yes	No
No	No	Yes	mother	No	never	No	1991-2000	No	Yes
No	No	Yes	mother	No	sometimes	No	1991-2000	Yes	No
No	No	Yes	mother	No	never	No	after 2006	Yes	No
Yes	No	Yes	mother	No	never	No	2001-2005	Yes	Yes
Yes	No	Yes	father	No	never	No	1991-2000	Yes	No
No	No	No	father	Yes	never	No	2001-2005	Yes	Yes
No	Yes	No	grandmother	No	never	No	1991-2000	No	No
No	No	No	mother	Yes	sometimes	No	2001-2005	Yes	Yes
No	No	No	mother	No	never	Yes	after 2006	Yes	No
No	No	Yes	mother	No	never	No	2001-2005	Yes	No
No	No	Yes	mother	Yes	sometimes	Yes	after 2006	Yes	Yes
No	No	No	mother	No	never	No	1991-2000	No	Yes
No	Yes	Yes	mother	Yes	never	No	1991-2000	No	Yes
No	No	No	father	Yes	never	No	1991-2000	Yes	Yes
No	No	No	mother	Yes	never	No	1991-2000	No	Yes
No	No	Yes	mother	Yes	sometimes	No	1991-2000	Yes	Yes
No	No	No	mother	No	never	No	2001-2005	Yes	No
No	No	No	grandmother	Yes	never	Yes	1991-2000	Yes	No
No	No	No	father	Yes	never	Yes	2001-2005	Yes	Yes
No	No	No	father	Yes	never	No	1980-1990	Yes	No
No	No	No	father	No	never	No	1980-1990	No	Yes
No	No	No	mother	Yes	never		1991-2000	Yes	Yes
No	No	Yes	mother	No	never	No	after 2006	No	No
No	No	No	mother	No	never	No	2001-2005	Yes	No
No	No	No	mother	No	never	No	1991-2000	No	No
No	No	Yes	mother	No	never	Yes	1991-2000	No	Yes
No	No	Yes	mother	Yes	never	No	2001-2005	Yes	No
No	No	No	mother	Yes		No	1991-2000	No	Yes
No	No	No	father	No	sometimes	No	before 1980	Yes	Yes
No	No	No	others	No	never	No	2001-2005	Yes	Yes
No	No	No	grandmother	Yes		No	after 2006	Yes	Yes
No	Yes	No	mother	Yes	sometimes	No	after 2006	No	Yes
No	No	No	father	No	always	No	1991-2000	No	Yes
No	No	No	mother	Yes	never	No	after 2006	Yes	No
No	No	No	grandmother	Yes	never	No	2001-2005	Yes	Yes
No	No	No	father	No	always	No	after 2006	Yes	No
No	No	No	father	No	never	No	2001-2005	Yes	No
No	No	No	mother	No	sometimes	Yes	2001-2005	Yes	Yes
No	No	No	father	No	never	No	2001-2005	Yes	No
No	Yes	Yes	mother	Yes	never	Yes	after 2006	No	Yes
No	No	No	mother	Yes	sometimes	Yes	after 2006	Yes	No
No	No	Yes	mother	Yes	sometimes	No	2001-2005	No	Yes
No	No	No	father	Yes	sometimes	No	after 2006	Yes	Yes
No	No	No	mother	No	sometimes	No	1980-1990	No	No
No	No	No	father	No	never	No	2001-2005		No
No	No	No	mother	Yes	sometimes	No	1991-2000	Yes	No
No	No	No	mother	No	always	No	1991-2000	Yes	No
No	No	No	father	No	never	No	2001-2005	Yes	No
No	No	No	mother	No	never	No	2001-2005	Yes	No
No	No	No	father	No	never	No	after 2006	Yes	No
No	No	No	father	No	never	No	2001-2005	Yes	No
No	No	No	father	Yes	never	No	after 2006	Yes	No
No	Yes	Yes	mother	No	always	Yes	2001-2005	Yes	No
No	Yes	Yes	mother	No	never	No	after 2006	Yes	No
No	No	No	mother	No	sometimes	Yes	2001-2005	Yes	No
No	No	No	father	No	never	No	2001-2005	Yes	No
No	No	No	mother	No	sometimes	No	2001-2005	Yes	No
No	Yes	Yes	mother	No	never	No	after 2006	Yes	Yes
No	No	No	mother	No	never	No	1991-2000		No
No	No	No	father	Yes	never	No	after 2006		No
No	Yes	No	mother	No	always	No	after 2006	Yes	No
No	No	No	father	No	never		1991-2000	Yes	No
No	No	No	mother	No	never	No	1991-2000	Yes	No
No	No	No	mother		never	No	2001-2005	Yes	No
No	No	No	father	No	never	No	1991-2000	No	No
No	No	No	mother	No	never	No	1991-2000	No	No
No	No	No	mother	Yes	never	No	2001-2005	No	Yes
No	Yes	No	mother	Yes	never	No	2001-2005	Yes	No
No	Yes	Yes	mother	No	never	No	1991-2000	No	Yes
No	Yes	No	mother	Yes	never	No	after 2006	Yes	Yes
No	No	No	mother		sometimes	No	2001-2005	Yes
No	No	No	father	No	never	Yes	after 2006	Yes	Yes
No	No	No	mother	No	sometimes	Yes	after 2006	Yes	No
No	No	No	mother	No	never	No	1991-2000	No	Yes
No	No	No	mother		never	No	after 2006	Yes	No
No	No	Yes	mother		never	No	2001-2005	No	Yes
No	No	No	grandmother	Yes	always	No	after 2006		No
No	No	Yes	mother	No	never	No	2001-2005	Yes	No
No	No	No	mother	Yes	never	Yes	2001-2005	Yes	Yes
Yes	No	No	mother	No	never	No	1980-1990	No	Yes
No	No	No	father	Yes	never	No	after 2006	No	Yes
No	Yes	No	father	Yes	never	No	1980-1990	No	No
No	No	Yes	mother	No	never	No	2001-2005	Yes	No
No	No	No	mother		never	No	2001-2005	No	No
No	No	No	father	No	never	No	1980-1990	No	No
No	No	No	father	Yes	never	No	1991-2000	No	No
No	No	No	mother	No	sometimes	No	2001-2005	Yes	No
No	No	No	mother			No	2001-2005	Yes	Yes
No	No	No	mother	Yes	sometimes	No	1991-2000	Yes	No
No	Yes	Yes	mother	Yes	never	No	before 1980	No	No
No	Yes	No	mother		never	No	1991-2000	No	No
No	No	No	mother	No	sometimes	No	2001-2005	Yes	Yes
No	No	No	mother	No	never	Yes	2001-2005	Yes	No
No	No	Yes	mother	Yes	never	No	1991-2000	No	Yes
No	Yes	No	mother	No	never	No	after 2006	Yes	No
No	No	No	mother	No	sometimes	No	1991-2000	No	No
No	No	Yes	mother	Yes	never	No	1991-2000	Yes	No
No	Yes	Yes	mother	No	never	No	before 1980	No	Yes
No	No	No	mother		never	No	1980-1990	No	Yes
No	No	No	mother		never	No	before 1980	Yes	No
No	No	Yes	mother	No	sometimes	No	1991-2000	No	No
No	Yes	Yes	mother	No	never	No	1980-1990	Yes	No
No	No	No	father	No	sometimes	Yes	1980-1990	No	No
No	No	No	father	No	sometimes	No	1980-1990	No	No
No	No	Yes	mother	No	always	No	2001-2005	Yes	No
No	Yes	Yes	mother	Yes	never	No	after 2006	Yes	Yes
No	Yes	Yes	others	Yes	never	No	2001-2005	Yes	Yes
No	Yes	No	mother	Yes	never	No	2001-2005	Yes	No
No	Yes	Yes	mother	Yes	never	No	2001-2005	Yes	Yes
No	No	No	father	Yes	never	No	1991-2000	No	No
No	No	No	mother		never	No	2001-2005	Yes	No
No	No	No	mother	No		No	2001-2005	Yes	No
No	No	No	mother	No	sometimes	No		No	Yes
No	No	No	mother	No	never	No	after 2006	Yes	Yes
No	No	No	mother		sometimes	No	1980-1990	No	Yes
No	No	No	mother	No	never	No	after 2006	Yes	Yes
No	No	No	mother	No	never		before 1980	Yes	No
No	No	Yes	mother	Yes	never	No	1991-2000	Yes	No
No	No	No	mother		sometimes	No	after 2006	Yes	No
No	No	No	mother	No	never	No	2001-2005	Yes	No
Yes	No	No	grandmother		never	Yes	1991-2000	Yes	No
No	No	No	mother	Yes	never	No	2001-2005	No	Yes
No	No	No	father	No	never	No		No	Yes
No	No	No	father	Yes	never	No	after 2006	No	Yes
Yes	No	Yes	mother		sometimes		2001-2005	Yes	No
Yes	Yes	Yes	mother		never	Yes	after 2006	Yes	No
Yes	No	No	father		sometimes		after 2006	Yes	No
Yes	Yes	No	mother		never		2001-2005	Yes	No
Yes	Yes	Yes	father		never		after 2006	Yes	Yes
Yes	Yes	Yes	mother	Yes	never		after 2006	Yes	No
Yes	Yes	Yes	mother		never		2001-2005	Yes	Yes
Yes	Yes	Yes	father	Yes	never	No	1991-2000	No	No
Yes	Yes	Yes	mother				2001-2005	Yes	Yes
Yes	No	Yes	mother		never		2001-2005	No	No
Yes	Yes	No	mother		sometimes		2001-2005	Yes	Yes
No	No	No	mother		never		2001-2005	Yes	Yes
No	No	Yes	mother		never		2001-2005	Yes	Yes
No	No	No	mother		sometimes		2001-2005	Yes	Yes
No	No	No	grandfather	Yes	never		after 2006	No	No
No	No	No	mother		sometimes		2001-2005	No	Yes
No	No	No	father	No	never	No	1991-2000	Yes	Yes
No	Yes	Yes			always	Yes	after 2006	Yes	Yes
No	No	No	mother		sometimes		2001-2005	No	Yes
No	No	No	mother		never		after 2006	Yes	No
No	No	No	mother		never		2001-2005	Yes	No
No	No	Yes	mother	No	never	No	1991-2000	Yes	No
Yes	Yes	Yes	grandmother	No	never	No	after 2006	Yes	Yes
Yes	Yes	Yes	mother	Yes	always	No	after 2006	No	Yes
No	No	No	father		sometimes	No			No
No	No	Yes	mother	No	always	No		No	Yes
No	No	No	mother	Yes	sometimes	No	2001-2005	Yes	No
Yes	No	Yes	mother	No	never	No	1980-1990	Yes	Yes
No	No	No	mother		always		1991-2000	Yes	No
No	No	Yes	mother	No	never	No	1991-2000	No	No
Yes	Yes	Yes	mother	Yes		No	1980-1990	No	Yes
No	No	No	mother	Yes		No	after 2006	No	Yes
No	No	No	mother	Yes	never	Yes	2001-2005	Yes	Yes
Yes	Yes	No	mother	Yes	never	No	2001-2005	Yes	No
Yes	Yes	Yes	mother	Yes	never	No	2001-2005	Yes	No
No	Yes	Yes	mother	No	sometimes	No	1980-1990	Yes	Yes
No	No	No		No		No	1991-2000	Yes	Yes
No	No	No	mother		never	No			Yes
No	No	No	Yes2	Yes	never	No	1980-1990	Yes
No	No	Yes	grandmother	Yes	never	No	2001-2005	Yes	No
No	No	No	mother	Yes	never		2001-2005	Yes	No
No	No	No	grandmother	Yes			after 2006	Yes	Yes
Yes	No	No	mother	No	never	Yes	2001-2005	Yes	Yes
Yes	Yes	Yes	mother	Yes		No	1991-2000	Yes	Yes
Yes	Yes	No	mother	Yes		No	2001-2005	Yes	Yes
Yes	Yes	Yes	mother	No	never	No	2001-2005	Yes	Yes
Yes	No	Yes	mother	No	never	No	2001-2005	Yes	Yes
Yes	No	No	mother		never	No			Yes
Yes	No	No	mother		sometimes	No	1991-2000	Yes	Yes
No	No	Yes	mother	No	always	No	after 2006	Yes	No
No	No	No	father	No	sometimes	No	2001-2005	Yes	Yes
No	No	No	mother	No		No	after 2006	No	No
No	Yes	Yes	mother	Yes	never	No	1980-1990	No	No
No	Yes	No	mother	No	never	Yes	2001-2005	No	No
No	No	No	grandmother	No	sometimes	No	2001-2005	No	No
No	No	No	2Nose/Eye	No	sometimes	No	after 2006	Yes	No
No	No	No	mother	No	never	No	2001-2005	Yes	No
No	No	Yes	mother	Yes	never	No	before 1980	No	Yes
No	No	No	grandfather				after 2006	Yes	No
Yes	Yes	Yes	mother	Yes	sometimes	Yes	1991-2000	Yes	No
Yes	Yes	Yes	grandmother	Yes	never	No	2001-2005		Yes
Yes	No	Yes	mother	No	never	No	1991-2000	Yes	No
Yes	No	No	mother	No	never	No	2001-2005	Yes	No
Yes	Yes	Yes	father	No	sometimes	No	before 1980	Yes	Yes
Yes	No	No	mother	Yes	always	No	2001-2005	Yes	No
No	No	No	grandmother		sometimes	Yes			Yes
Yes	No	No	mother	Yes	never	No	2001-2005	Yes	No
No	No	No	mother		never	No	2001-2005	Yes	No
No	No	No	mother	No	never	No	1980-1990	Yes	No
No	No	No	grandmother	Yes	never	No	1980-1990	Yes	Yes
No	No	No	grandmother		never	No	2001-2005	Yes	No
No	No	No	father	No	sometimes	No	1991-2000	No	Yes
No	No	No	father	No	never	No	2001-2005	Yes	Yes
No	No	No	grandmother				after 2006	Yes
Yes	Yes	Yes	grandmother	No		No	after 2006	No	No
No	No	No	father	Yes	never	No	1991-2000	Yes	Yes
No	Yes	Yes	father	No	never	No	1980-1990	Yes	Yes
No	No	No	father	No	never	No	after 2006	Yes	No
Yes	No	Yes	mother	Yes	never	No	1991-2000	Yes	No
No	No	No		No	sometimes	No	1980-1990	No	No
No	No	No	grandmother	No		No	2001-2005	Yes	Yes
No	No	No	grandfather	Yes	never	Yes	2001-2005	No	No
No	No	No	grandmother			No	before 1980	Yes	Yes
No	No	Yes	grandfather	No	sometimes	No	after 2006	Yes
No	No	No	father		sometimes		2001-2005	Yes	Yes
No	No	No	mother		sometimes		after 2006	Yes	No
No	No	No	mother				2001-2005	Yes	Yes
No	No	No	mother	Yes	never		after 2006	Yes	Yes
Yes	No	No	mother	No	always	No		No	Yes
Yes	Yes	No	mother	No		No	2001-2005	Yes	No
No	No	No	mother
No	No	No	mother
No	No	No	mother
No	No	No	mother
No	No	No	mother
No	No	No	mother
No	No	No	mother
No	No	No	mother
No	No	No	mother
No	No	No	mother
No	No	No	mother
No	No	No	grandmother
No	No	No	mother
No	No	No	mother
No	No	No	mother
Yes	Yes	Yes	father	Yes	never	No	1980-1990	No	No
No	No	No	mother	No	sometimes	No	2001-2005	Yes	No
Yes	Yes	Yes	father	No	sometimes	No	1991-2000	No	Yes
No	Yes	No	mother	No	sometimes	No	2001-2005	Yes	Yes
Yes	No	Yes	mother	No	sometimes	No	2001-2005	Yes	Yes
No	No	No	mother	No	never	No			Yes
No	No	No	mother		sometimes	Yes	2001-2005	Yes	Yes
No	Yes	Yes	mother	No	sometimes	No	1980-1990	Yes	Yes
No	Yes	No	mother	No	sometimes	No	1991-2000	Yes	Yes
No	No	No	Yes2	No	sometimes	No	2001-2005	No	No
Yes	Yes	No	mother	Yes	never	No	1991-2000	No	No
Yes	No	Yes	mother	No	never	No	2001-2005	Yes	Yes
No	No	No			never	No			No
No	No	No	Yes2	No	sometimes	Yes	1991-2000	Yes	Yes
Yes	No	No	father	No	never	No	2001-2005	Yes	Yes
Yes	Yes	Yes	mother	Yes	never	No	1991-2000	Yes	Yes
No	No	No	mother	No	never	No	1991-2000	Yes	Yes
Yes	Yes	Yes	father	Yes	never	No	after 2006	Yes	No
No	No	No	father	Yes	never	No	after 2006	No	No
No	Yes	Yes	father	Yes	never	No	1991-2000	No	No
No	Yes	No	father	Yes	sometimes	No	1991-2000	Yes	No
No	No	Yes	mother	No	never	No	1991-2000	No	Yes
No	No	No	mother		never	No			No
No	No	No	Yes2	No	never	Yes	1991-2000	Yes	Yes
Yes	Yes	No	father		never	Yes	after 2006	Yes
Yes	Yes	No	father		never	Yes	after 2006	Yes	Yes
Yes	No	No	mother	No	always	No	1980-1990	Yes	Yes
No	No	Yes	father	No	sometimes	No	1991-2000	Yes	Yes
Yes	No	Yes		No	never	No	before 1980	No	Yes
Yes	Yes	Yes	mother	Yes	never	No	2001-2005	Yes	Yes
Yes	Yes	Yes	mother	No	never	No	1980-1990	Yes	Yes
Yes	Yes	Yes	mother	Yes	sometimes	No	1991-2000	Yes	Yes
Yes	Yes	Yes	mother	No	never	No	2001-2005	Yes	No
No	Yes	Yes	mother	No	never	No	after 2006	Yes	Yes
No	No	No	father	No	never		1980-1990	Yes	Yes
No	No	No	mother	No	never	No	after 2006	No	Yes
No	Yes	Yes	mother	Yes		No	1980-1990	No	Yes
No	No	No	mother	Yes	never	No	after 2006	Yes	Yes
No	No	No	mother	Yes	never	No	1980-1990	No	No
No	Yes	No	mother	No	never	Yes	2001-2005	No	Yes
No	No	No	mother	No	sometimes	No	1991-2000	Yes	Yes
No	No	Yes	mother		never		1991-2000	Yes	Yes
Yes	No	Yes	mother	No	sometimes	No	1991-2000	No	Yes
Yes	Yes	Yes	mother	No	never	No	1991-2000	No	Yes
Yes	Yes	Yes	mother	Yes	always	No	1991-2000	No	Yes
Yes	Yes	Yes	mother	Yes	never	No	1980-1990	No	No
Yes	Yes	Yes	mother	No	sometimes	No	1980-1990	No	No
Yes	Yes	No	mother	Yes	never	No	1980-1990	No	Yes
Yes	Yes	Yes	mother	No	sometimes	Yes	1991-2000	Yes	Yes
Yes	Yes	Yes	mother	No	never	No	2001-2005	Yes	No
No	No	No	grandfather	Yes	sometimes	No	2001-2005	Yes	No
Yes	Yes	Yes	mother	No		No	after 2006	Yes	Yes
Yes	No	No	mother	Yes	sometimes	No	2001-2005	Yes	No
No	No	No	mother	No	never	Yes	1991-2000	Yes	Yes
Yes	Yes	Yes	father	Yes	never	No	1991-2000	No	No
No	No	Yes	mother	No	never	No	2001-2005	No	Yes
Yes	No	Yes	mother	No	never	No	1991-2000	No	No
Yes	No	No	mother	No	never	No	2001-2005	Yes	No
No	No	No	grandmother	No	never	No	1991-2000	Yes	Yes
Yes	Yes	Yes	mother	Yes	never	No	before 1980	No	Yes
Yes	Yes	Yes	father	Yes	never	No	1980-1990	Yes	Yes
No	No	No	father	No	never	No	after 2006	Yes	No
No	No	No	grandmother	No	sometimes	No	2001-2005	No	Yes
No	No	No	mother	No	never	No	1980-1990	Yes	Yes
Yes	No	Yes	father	Yes	sometimes	No	1980-1990	Yes	Yes
No	No	No	mother	No	never	No	1991-2000	Yes	Yes
No	No	Yes	mother	Yes	sometimes	No	1991-2000	Yes	Yes
Yes	No	Yes	mother	Yes	never		2001-2005	No	Yes
Yes	No	Yes	mother		sometimes		1991-2000	No	Yes
Yes	Yes	Yes	mother		never		after 2006	No	Yes
Yes	No	Yes	mother		never		1991-2000	No	Yes
Yes	No	Yes	mother		never		2001-2005	No	Yes
Yes	Yes	Yes	mother	Yes	never		2001-2005	Yes	Yes
No	Yes	No	mother		never		after 2006	Yes	No
No	No	No	father		never		1980-1990	No	No
No	No	No	mother		never		2001-2005	No	No
Yes	No	Yes	grandmother		never		2001-2005	Yes	Yes
Yes	No	No	mother	No	never	Yes	1980-1990	Yes	No
Yes	Yes	Yes	mother	Yes	never	No	2001-2005	No	No
Yes	Yes	Yes	mother	Yes	never	No	after 2006	No	No
Yes	Yes	Yes	mother	No	never	Yes	2001-2005	No	Yes
Yes	Yes	Yes	grandmother	Yes	never	No	1991-2000	Yes	No
Yes	Yes	Yes	mother	Yes	never	No	1991-2000	Yes	No
Yes	Yes	Yes	mother	No	never	No	before 1980	No	No
Yes	Yes	Yes	mother	Yes	sometimes	No	1980-1990	Yes	No
Yes	Yes	Yes	father	Yes	never	No	2001-2005	No	Yes
Yes	No	No	grandmother	No	never	No	2001-2005	Yes	No
Yes	No	No	father	No	never	No	before 1980	Yes	No
Yes	No	No	mother	No	sometimes	No	before 1980	No	Yes
Yes	Yes	Yes	mother	No	never	No	1991-2000	No	Yes
Yes	Yes	Yes	mother	No	never	No	after 2006	Yes	No
No	No	No	mother	No	sometimes	No	2001-2005		Yes
No	Yes	No	mother	No	never	No		No	No
No	No	No	mother	No	never	No	2001-2005	Yes	No
Yes	Yes	Yes	father	No	sometimes	Yes	2001-2005	Yes	No
No	No	No	father	No	always	No	2001-2005	Yes	No
No	No	No	mother	No	sometimes	No	2001-2005	No	No
No	No	Yes	mother	Yes	sometimes	No	1980-1990	Yes	Yes
No	No	No	Yes2		never	No	before 1980	No	Yes
No	No	No	mother		never	No	1991-2000	No	No
No	No	No	mother	No	sometimes	No	1980-1990	No	No
No	Yes	Yes	mother	No	never	No	2001-2005	Yes	Yes
Yes	Yes	No	father	Yes	always	Yes	2001-2005	No	Yes
No	No	No	mother		never		2001-2005	No	Yes
No	No	Yes	mother	No	sometimes	No	2001-2005	Yes	No
Yes	Yes	Yes	mother	Yes	never	No	2001-2005	Yes
No	No	No		No	never	No	2001-2005	Yes	No
No	Yes	Yes	grandmother	No		Yes	after 2006	Yes	Yes
Yes	Yes	Yes	father			No	before 1980
No	Yes	No	mother	No	never	Yes	1991-2000	No	Yes
Yes	No	No	mother	No	never	No	1991-2000	Yes	Yes
Yes	No	No	father	No	never	No	2001-2005	No	No
Yes	Yes	Yes	mother	Yes	never	No	1991-2000	Yes	No
Yes	Yes	Yes	mother	No	never	No	after 2006	Yes	No
Yes	No	Yes	mother	No	sometimes	No	1991-2000	No	Yes
No	No	No	mother		sometimes	No	1991-2000	Yes	No
No	No	No	grandmother	No	always	No	after 2006	No	No
No	No	No	mother	Yes	never	No	2001-2005	Yes	No
No	No	No	mother	No	never	No	2001-2005	No	Yes
No	Yes	No	mother	No	never	No	after 2006	Yes	No
No	No	No	mother	No	never	No	1991-2000	No	Yes
Yes	Yes	Yes	mother	Yes	never		2001-2005	Yes	Yes
No	No	No	father		never		1991-2000	No	Yes
No	No	No	father	No	never	No	2001-2005	Yes	Yes
Yes	No	No	father	No	never	No	2001-2005	Yes	No
Yes	Yes	Yes	mother	Yes	never	No	2001-2005	No	Yes
Yes	Yes	Yes	mother	Yes	never	No	1991-2000	No	Yes
Yes	Yes	Yes	mother	Yes	sometimes	Yes	2001-2005	Yes	Yes
Yes	Yes	Yes	mother	No	never	Yes	2001-2005	Yes	No
Yes	No	Yes	mother	No	never	No	1980-1990	No	No
Yes	No	No	mother	Yes	sometimes	No	1991-2000	Yes	No
Yes	Yes	Yes	mother	Yes	never	No	2001-2005	Yes	No
No	Yes	Yes	mother	No		No	after 2006	Yes	Yes
Yes	No	Yes	father	No	never	No	after 2006	Yes	Yes
No	Yes	No	mother	No	never	No	2001-2005	Yes	No
No	No	Yes	mother	Yes	never	Yes	after 2006	Yes	Yes
Yes	No	No	mother	Yes	never	No	2001-2005	Yes	No
Yes	Yes	Yes	mother		never	No	1980-1990	Yes	Yes
Yes	Yes	Yes	mother	Yes	never	Yes	1991-2000	Yes	No
No	Yes	No	mother		never	No	1980-1990	No	No
No	Yes	No	father	Yes	sometimes	Yes	1991-2000	Yes	Yes
No	No	No	mother	No	never	No	2001-2005	Yes	Yes
No	No	No	mother	No	never	Yes	after 2006	Yes	Yes
Yes	Yes	No	mother	No	never	No	after 2006	Yes	No
No	No	No	mother	No	never	No	1991-2000	No	No
No	No	No	father	No	never	No	1980-1990	No	Yes
Yes	No	No	father	Yes	never	No	before 1980	Yes	No
Yes	No	Yes	mother	No	never	No	before 1980	No	Yes
No	No	Yes	mother	No	never	No	before 1980	Yes	No
No	Yes	Yes	mother	No	never	No	1980-1990	Yes	Yes
No	No	No	father	Yes	sometimes	No	2001-2005	Yes	No
No	No	No	grandmother	No	always	No	1991-2000	No	No
No	No	No	father	No	never	No	2001-2005	No	Yes
No	Yes	Yes	mother	Yes	sometimes	No	before 1980	Yes	Yes
No	No	No	mother	No	never	No	1991-2000	Yes	Yes
No	No	No	father	Yes	never	No	2001-2005	Yes	No
No	Yes	Yes	mother	No	never	No	1980-1990	Yes	No
No	No	No	mother	Yes	never	No	2001-2005	Yes	Yes
No	No	No	father	Yes	never	No	1991-2000	No	Yes
Yes	Yes	Yes	mother	Yes	never	No	2001-2005	No	No
Yes	Yes	Yes	father	No	always	No	2001-2005	Yes	No
No	No	Yes	mother		never	No	2001-2005	No	No
No	No	Yes	mother	No	sometimes	No	before 1980	No	Yes
No	No	No	father	Yes	never	No	2001-2005	Yes	No
No	No	No	mother		sometimes	No	2001-2005	Yes	No
No	No	Yes	mother	No	never	No	2001-2005	Yes	No
Yes	Yes	Yes	mother			Yes	2001-2005	Yes	Yes
No	Yes	Yes	mother		always	Yes	2001-2005	Yes	Yes
No	No	No	mother		never		1991-2000	Yes	Yes
No	No	No	mother		never		2001-2005	Yes	No
Yes	Yes	Yes	mother	Yes	sometimes	No	2001-2005	Yes	Yes
Yes	No	No	mother	Yes	never	No	after 2006	No	Yes
No	No	No	mother	No	never	No	1980-1990	Yes
No	No	Yes	mother	No	always	No	1991-2000	No	No
No	No	No		No	sometimes		1980-1990	Yes	Yes
Yes	Yes	No	father	Yes	never	No	before 1980	Yes	Yes
Yes	No	No		No	sometimes	No	2001-2005	No	No
Yes	Yes	Yes	mother	No	sometimes	No	1991-2000	No	No
Yes	No	No	mother	No	always	No	after 2006	Yes	Yes
Yes	No	No	mother	Yes	never	No	1980-1990	Yes	Yes
Yes	No	No	mother	Yes	never	No	after 2006	Yes	No
Yes	Yes	No	mother	No	never	Yes	before 1980	Yes	Yes
Yes	Yes	No	mother	Yes	never	No	1980-1990	No	No
Yes	Yes	Yes	mother	Yes	never	No	1991-2000	No	Yes
Yes	Yes	Yes	mother	Yes	never	No	1991-2000	No	Yes
Yes	Yes	Yes	mother	No	never	No	2001-2005	No	No
Yes	Yes	Yes	mother	No		No	2001-2005	No	No
Yes	Yes	Yes	mother		sometimes	No	1991-2000	Yes	No
Yes	Yes	No	father	Yes	never	No	1980-1990	No	No
Yes	Yes	Yes	mother	No	never	No	1980-1990	No	No
Yes	Yes	Yes	mother	No	sometimes	No	2001-2005	No	Yes
Yes	Yes	Yes	mother	Yes	never	No	2001-2005	Yes	No
Yes	No	No	mother		sometimes	No			No
No	No	Yes	mother	Yes	sometimes	No	1980-1990	Yes	Yes
Yes	No	No	mother	Yes	never	Yes	2001-2005	Yes	Yes
Yes	Yes	No	mother	No	never	Yes	after 2006	Yes	Yes
Yes	No	Yes	mother	No	sometimes	No	2001-2005	Yes	Yes
No	No	Yes	father	No	sometimes	No	1980-1990	No	No
No	No	No	mother	No	sometimes	Yes	2001-2005	Yes	No
Yes	Yes	Yes	mother	Yes	never	No	1980-1990	No	Yes
Yes	No	Yes	mother	Yes	never	No		Yes	No
Yes	No	No	mother	No	sometimes	Yes	2001-2005	Yes	Yes
Yes	No	Yes	father	No	never	No	2001-2005	Yes	Yes
Yes	Yes	Yes	mother	No	sometimes	No	2001-2005	Yes	Yes
Yes	Yes	Yes	mother	No	sometimes	No	1980-1990	Yes	Yes
No	No	No	father	No	sometimes	No	after 2006	Yes	No
No	Yes	Yes	mother	No	never	No	2001-2005	Yes	No
Yes	Yes	Yes	mother	No	never	No	before 1980	No	No
No	Yes	No	mother	Yes	never	No	1980-1990	Yes	Yes
No	No	No	mother	Yes	never	No	1991-2000	No	No
Yes	No	Yes	mother	Yes	never	No	1991-2000	No	No
No	No	No	father	No	sometimes			No	Yes
No	Yes	Yes	mother	Yes	sometimes	No	after 2006	Yes	No
No	Yes	Yes	mother	No	never	No	1991-2000	No	No
No	No	No		No	never	No			Yes
No	No	No	father	No	never	No	2001-2005	No	Yes
No	No	No	father	No	never	No	before 1980	Yes	Yes
No	No	No	grandmother	Yes	sometimes	Yes	after 2006	Yes	Yes
No	No	No	mother	No	always	No	after 2006	No	No
No	Yes	Yes	father	Yes	always	No	after 2006	Yes	Yes
No	Yes	No	mother	No	sometimes	No	after 2006	No	Yes
No	No	No	mother	No	sometimes	No	before 1980	No	Yes
No	No	Yes	father	Yes	never	No	1980-1990	No	No
No	No	No	mother	No	never	Yes	after 2006	Yes	No
No	Yes	No	father	No	sometimes	No	2001-2005	Yes	Yes
No	No	No	father	No	never	No	1991-2000	No	No
No	Yes	No	mother	Yes	never	No	1991-2000	Yes	Yes
No	No	No	father	Yes	sometimes	No	1980-1990	No	Yes
No	No	No	father	No	always	No	after 2006	Yes	7
No	No	No	mother	Yes	sometimes	No	1980-1990	No	No
No	Yes	No	mother	No	never	No	2001-2005	Yes	No
Yes	No	Yes	mother	No	never	No	after 2006	Yes	Yes
No	Yes	No	mother	No		No	after 2006	Yes	No
No	No	No	mother	Yes	sometimes	No	2001-2005	Yes	No
No	No	No	mother	No	never	No	1980-1990	No	Yes
No	No	No	mother	Yes	never	Yes	after 2006	Yes	No
Yes	Yes	No	mother	No	never	No	2001-2005	Yes	Yes
No	No	No	mother	Yes	sometimes	No	after 2006	No	No
Yes	Yes	Yes	mother	Yes	never	No	2001-2005	No	Yes
No	Yes	No	father		never	No	1991-2000	Yes	No
No	Yes	Yes	mother	Yes	never	No	2001-2005	No	No
No	No	No	mother	No	never	No	1991-2000	Yes	No
No	No	No	mother	No	never	No	2001-2005	Yes	No
No	Yes	No	mother		never	No	1991-2000	Yes	No
No	No	No	mother	No	never	No	1980-1990	No	Yes
No	No	No	mother	No	never	No	1980-1990	No	Yes
No	No	No	mother	Yes	always	No	2001-2005	Yes	No
No	No	No	mother	No	never	No	2001-2005	Yes	No
No	No	No	mother	Yes	never	No	after 2006	Yes	Yes
No	No	No	father	No	sometimes	No	after 2006	Yes	Yes
Yes	No	Yes	mother	Yes	never	No	after 2006	No	Yes
Yes	Yes	No	mother	Yes	sometimes	No	1991-2000	No	No
Yes	Yes	No	father		never	No	2001-2005	Yes	No
No	No	No	father	Yes	sometimes	No	1980-1990	Yes	Yes
No	No	No	mother	No	sometimes	No		Yes	Yes
No	No	No	father	No	sometimes	No	2001-2005	No	Yes
Yes	Yes	Yes	mother	Yes	sometimes		2001-2005	Yes	No
Yes	No	Yes	mother		never		1991-2000	Yes	No
Yes	Yes	Yes	mother	Yes	never		2001-2005	Yes	Yes
Yes	No	Yes	mother		never		2001-2005	Yes	Yes
Yes	Yes	Yes	mother		sometimes		after 2006	Yes	No
Yes	Yes	No	mother		never		2001-2005	Yes	Yes
No	No	No			sometimes	Yes	after 2006	Yes	Yes
No	No	No	mother		never		1991-2000	Yes	No
Yes	No	No	mother		never		2001-2005	Yes	No
No	No	Yes	mother		never		2001-2005	Yes	No
No	No	No	mother		never		after 2006	No	No
No	No	No	mother		sometimes		2001-2005	Yes
No	No	No	mother				after 2006	Yes	Yes
No	No	No	father		sometimes	Yes	1980-1990	No	Yes
No	No	Yes	mother			Yes	2001-2005	Yes	Yes
No	Yes	No	mother	Yes	sometimes	No	before 1980	Yes	7
No	No	No	mother	Yes	never	Yes	2001-2005	Yes	No
Yes	Yes	No	mother	No	never		2001-2005	Yes	No
Yes	Yes	Yes	mother	Yes	never	No	2001-2005	Yes	Yes
Yes	Yes	Yes	mother		never		2001-2005	Yes	No
Yes	No	Yes	mother	Yes	always	No	1991-2000	No	No
Yes	Yes	Yes	father	Yes	never	Yes	1991-2000	Yes	Yes
Yes	Yes	No	mother		sometimes	No	2001-2005	Yes	No
Yes	No	Yes	mother	Yes	never		1991-2000	No	No
Yes	No	Yes	grandmother	Yes	never		1991-2000	Yes	No
Yes	Yes	No	mother	No	never	No	2001-2005	Yes	No
Yes	Yes	Yes	mother	Yes	never	No	1991-2000	Yes	Yes
Yes	Yes	No	mother	No	sometimes	No	1980-1990	Yes	Yes
Yes	Yes	Yes	mother	No	always	No	2001-2005	Yes	Yes
Yes	Yes	Yes	father	Yes		No	1991-2000	Yes	Yes
Yes	Yes	No	mother	No	never	No		No	Yes
Yes	Yes	Yes	grandmother	Yes	always	No	2001-2005	Yes	Yes
Yes	No	No	mother		never	Yes	2001-2005	No	No
Yes	No	No	mother	No	sometimes	No	2001-2005	Yes	Yes
Yes	Yes	Yes	mother	No	always	No	2001-2005	Yes	No
Yes	No	Yes	mother	No	always	No	2001-2005	Yes	No
Yes	No	Yes	mother	No	never	No	2001-2005	Yes	No
Yes	Yes	Yes	mother	Yes	sometimes	No	after 2006	Yes	No
No	Yes	Yes	mother		sometimes	Yes	after 2006	Yes	Yes
Yes	No	No	mother	Yes	never	Yes	2001-2005	No	Yes
Yes	Yes	No	mother	Yes	never	Yes	2001-2005	No	Yes
Yes	Yes	Yes	mother		never	No	after 2006	Yes	No
Yes	Yes	Yes	mother	No	sometimes	No	2001-2005	Yes	Yes
Yes	No	Yes	mother	Yes	sometimes	No	after 2006	No	No
Yes	Yes	Yes	mother	Yes	always		1980-1990	No	Yes
Yes	Yes	No	mother	No	sometimes	No	after 2006	Yes	Yes
Yes	Yes	Yes			always	No	2001-2005	No	No
Yes	Yes	No	mother	Yes	never	No	2001-2005	Yes	Yes
Yes	No	Yes	mother	Yes	never	No	2001-2005	No	Yes
Yes	No	No	father	Yes	never	No	after 2006	No	Yes
Yes	No	Yes	mother		never	No	1991-2000	Yes	No
Yes	No	No			never	No	2001-2005	No	Yes
Yes	No	Yes	father	No	never	No	after 2006	No	Yes
No	No	No	grandmother	No	never	No	after 2006	Yes	No
Yes	Yes	Yes	father	No	never	No	after 2006	No	No
Yes	Yes	Yes	mother	No	never	Yes	2001-2005	Yes	Yes
Yes	No	No	mother	Yes	sometimes	Yes	2001-2005	No	No
Yes	No	No	mother	No	never	No	after 2006	Yes	No
Yes	No	No	mother	No	sometimes	No	2001-2005	Yes	Yes
Yes	No	No	father	Yes	never	No	1991-2000	No	No
Yes	No	Yes	mother	Yes	never	No	before 1980	No	No
Yes	No	No	mother	Yes	never	No	1980-1990	No	Yes
Yes	No	Yes	mother	No	always	No	before 1980	No	Yes
Yes	No	No	mother	Yes	never	No	before 1980	No	Yes
Yes	Yes	No	mother		never	No	before 1980	Yes	Yes
Yes	No	No	mother	No	sometimes	No	before 1980	No	No
Yes	No	Yes	mother		never	No	before 1980	Yes	Yes
Yes	Yes	Yes	mother	No	never	No	1991-2000	Yes	Yes
Yes	No	No	mother	No	never	No	2001-2005	No	No
Yes	Yes	No	mother	Yes	never	No	2001-2005	Yes	Yes
Yes	Yes	Yes	mother	No	never	No	1991-2000	Yes	Yes
Yes	Yes	No		Yes	never	No	after 2006	Yes	No
No	Yes	No	mother	Yes	sometimes	No	after 2006	Yes	No
Yes	Yes	No	mother	Yes	sometimes	No	1991-2000	No	Yes
Yes	Yes	No	father	No	sometimes	No	1991-2000	No	No
No	No	No	grandfather	Yes	never		1991-2000	Yes	No
No	No	No	mother	Yes	sometimes	No	1991-2000	Yes	Yes
No	Yes	Yes	mother	Yes	never	No	1991-2000	Yes	Yes
No	No	No	mother	No		No	1991-2000	Yes	Yes
Yes	Yes	Yes	mother	No	sometimes	No	1991-2000	Yes	Yes
Yes	Yes	No	mother	No	never	Yes	after 2006	Yes	No
No	Yes	Yes	mother	Yes	never	Yes	after 2006	No	No
No	No	No	mother	No	never	No	after 2006	Yes	No
Yes	Yes	Yes	mother	No	sometimes	No	2001-2005	No	Yes
Yes	No	No	father	No	never	No	1991-2000	Yes	Yes
Yes	Yes	Yes	mother	Yes	never	No	1991-2000	Yes	Yes
Yes	No	No	mother	No	never	No	2001-2005	Yes	No
Yes	No	No	mother	No	never	No	1980-1990	No	Yes
Yes	No	No	father	Yes	never	No	1991-2000	No	No
No	Yes	No	father	No	never	No	1980-1990	No	Yes
No	Yes	No	father	Yes	never	No	1980-1990	No	No
No	No	No	mother	Yes	sometimes	No	2001-2005	Yes	No
Yes	No	No	mother	Yes	never	No	1991-2000	Yes	No
No	No	Yes	mother	Yes	never	No	after 2006	Yes	Yes
Yes	Yes	Yes	mother	No	sometimes	No	1991-2000	Yes	Yes
Yes	Yes	Yes	mother	No	never	No	2001-2005	Yes	Yes
Yes	Yes	No	mother	Yes	never	Yes	2001-2005	No	No
Yes	Yes	Yes	mother	Yes	never		1991-2000	No	No
Yes	Yes	Yes	father	No	sometimes	Yes	1991-2000	Yes	No
Yes	Yes	Yes	mother	Yes	never	No	after 2006	Yes	No
Yes	No	Yes	mother	No	never	No	2001-2005	No	Yes
Yes	No	Yes	mother	Yes	never	No	2001-2005	Yes	No
No	No	No	mother	Yes	never	Yes	before 1980	No	No
No	No	No	mother	No	never	No	before 1980	No	Yes
Yes	No	No	mother	No	sometimes	No		No	Yes
Yes	Yes	Yes	mother	Yes	never	No	1991-2000	No	Yes
Yes	No	No	mother		never	No	after 2006	Yes	Yes
No	No	Yes	Yes2	No	never	No	2001-2005	Yes	No
Yes	Yes	Yes	father	Yes	never	No	after 2006	Yes	No
Yes	Yes	Yes	mother		never	No	2001-2005	Yes	Yes
No	No	No	others	No	never	No	after 2006	Yes	Yes
Yes	Yes	No	mother	No	never	No	2001-2005	No	No
No	Yes	Yes	father	No	always	No	1991-2000	Yes	No
No	No	Yes	mother	Yes	never	No	1980-1990	No	Yes
No	Yes	No	mother	No	never	Yes	2001-2005	Yes	Yes
No	Yes	No	mother	Yes	sometimes	No	after 2006	Yes	Yes
Yes	No	Yes	mother	Yes	never	No	after 2006	Yes	No
No	No	Yes	father	No	never	Yes	after 2006	Yes	No
Yes	No	Yes	mother	Yes	never	Yes	1991-2000	No	Yes
Yes	Yes	No	mother	Yes	never	No	2001-2005	Yes	No
No	No	Yes	mother	Yes	sometimes	No	after 2006	Yes	Yes
No	No	No	mother	No	never	No	1980-1990	No	Yes
Yes	No	No	mother	Yes	sometimes	No	1991-2000	Yes	No
No	No	No	mother	No	sometimes	No	1980-1990	Yes	No
No	No	No	mother	No	sometimes	No	1980-1990	No	Yes
No	No	No	father	Yes	sometimes	No	after 2006	Yes	Yes
No	Yes	Yes	mother	Yes	sometimes	No	2001-2005	Yes	Yes
Yes	No	No	mother	Yes	sometimes	No	after 2006	No	Yes
Yes	No	No	father	No	never	No	after 2006	Yes	Yes
Yes	No	No	mother	No	never	No	after 2006	Yes	Yes
Yes	No	No	mother	No	never	No	1980-1990	No	Yes
No	No	No	father	Yes	sometimes	No		Yes	Yes
Yes	Yes	Yes	mother		never	No	1991-2000	Yes	Yes
No	Yes	No	mother	Yes	sometimes	No	1991-2000	No	No
No	No	Yes	father	Yes	never	No	2001-2005	Yes	No
No	No	Yes	mother	Yes	never	No	after 2006	Yes	No
No	No	Yes	mother	Yes	never	Yes	2001-2005	No	Yes
No	No	No	mother	No	never	No	2001-2005	Yes	Yes
No	No	No	grandmother	No	always	No	after 2006	No	No
No	No	No	mother	No	sometimes	No	1991-2000	Yes	No
No	No	No	father	No	never	No	2001-2005	Yes	No
No	No	No	father	Yes	sometimes	No	1991-2000	No	No
No	Yes	No	father	No	never	No	2001-2005	Yes	Yes
No	No	No	mother	Yes	never	Yes	2001-2005	Yes	Yes
No	No	No	mother	No	never	No	2001-2005	No	Yes
No	No	No	father		always		2001-2005	Yes	No
No	No	No	Yes2	No	sometimes	No	1991-2000	No	Yes
No	No	No	mother	No	always	No	2001-2005	Yes	No
No	No	No	father	Yes	never	Yes	1991-2000	Yes	No
No	No	No	father	No	sometimes	No	1991-2000	No	Yes
No	No	No	mother	No	never	No	1980-1990	Yes	No
No	No	No	father	No	sometimes	No	1980-1990	No	Yes
No	No	No	father	No	sometimes	No	after 2006	Yes	Yes
No	Yes	Yes	mother	Yes	never	No	after 2006	Yes	Yes
No	No	No	father	No	never	No	1980-1990	No	Yes
No	No	No	mother	No	sometimes	No	2001-2005	Yes	No
No	No	Yes	mother	No	always	No	2001-2005	Yes	No
No	No	Yes	mother	No	never	No	after 2006		No
No	No	No	mother	No	never	No	1991-2000	No	No
No	No	No	mother	No	never	No	after 2006	Yes	Yes
No	No	No	mother	No	never	No	2001-2005	Yes	Yes
No	No	No	mother	No	never	No	1991-2000	No	Yes
No	No	No	mother	No	never	Yes	1991-2000	No	No
No	No	No	mother	No	sometimes	No	1991-2000	No	Yes
No	No	No	others	Yes	never	Yes	after 2006	No	No
No	No	No	mother	Yes	never	No	before 1980	No	Yes
No	No	No	mother	No	never	No	before 1980	No	No
No	No	No	father		always	No	1991-2000	No	No
No	No	No	father	No	never	No	1991-2000	No	No
No	Yes	Yes	mother	No	never	No	2001-2005	Yes	No
No	No	No	mother	No	never	No	2001-2005	Yes	Yes
No	No	Yes	mother		always	No	after 2006	Yes	Yes
No	No	Yes	grandmother	No	never	No	2001-2005	Yes	No
No	No	No	father	No	never	No	2001-2005	Yes	No
No	No	No	mother	No	never	No	after 2006	Yes	Yes
No	No	No	father	Yes	sometimes	Yes	2001-2005	Yes	Yes
No	No	No	grandmother	No	never	No	1991-2000	No	No
No	No	No	mother	No	never	No	after 2006	Yes	No
No	No	No	mother	No	never	No	after 2006	Yes	Yes
No	No	Yes	mother	No	never	No	before 1980	No	No
No	No	No	mother	No	never	No	2001-2005	No	Yes
No	No	No	mother	No		No	1991-2000	No	No
No	No	No	mother	No	never	No	1980-1990	No	Yes
No	Yes	No	mother	Yes	never	No	1980-1990	No	Yes
No	No	No	mother		sometimes	No	2001-2005	Yes	Yes
No	No	No	mother	No	never	No	2001-2005	Yes	No
No	No	Yes	father	Yes	sometimes	No	after 2006	Yes	No
No	No	No	mother	Yes	never	No	after 2006	Yes	No
No	No	Yes	mother	No	never	No	1991-2000	Yes	No
No	No	Yes	grandmother	Yes	never	No	1991-2000	Yes	Yes
No	No	No	father	No	sometimes	No	2001-2005	Yes	Yes
No	No	No	mother	No	sometimes	No	2001-2005	Yes	Yes
No	Yes	Yes	mother	No	never	No	2001-2005	Yes	No
No	No	No	father	No	never	No	before 1980	No	No
No	Yes	No	mother	Yes	sometimes	No	after 2006	No	Yes
No	No	No		No	sometimes	No	after 2006	Yes	Yes
No	No	No	father	No	sometimes	No	1991-2000	No	No
No	No	No	father	No	never	No	after 2006	No	Yes
No	No	Yes	mother	Yes	never	No	2001-2005	Yes	No
No	Yes	Yes	father		never	No	1991-2000	No	No
No	No	No	mother	No	sometimes	No	1980-1990	No	No
No	No	No	mother	No	never	No	1991-2000	No	No
No	Yes	Yes	father	Yes	never	No	1980-1990	Yes	Yes
No	No	No	mother	No	sometimes	No	2001-2005	Yes	No
No	No	No	grandmother	Yes	never	No	before 1980	Yes	Yes
No	Yes	No	mother	No	sometimes	No	after 2006	Yes	No
No	No	No	father	No	never	No	1991-2000	No	Yes
No	No	Yes	mother	No	never	No	1991-2000	Yes	Yes
No	No	No	mother	Yes	never	No	1991-2000	No	Yes
Yes	Yes	No	father	Yes	never	No	2001-2005	Yes	Yes
No	No	Yes	father		never	No	2001-2005	Yes	Yes
No	No	No	father	Yes	always	No	2001-2005	Yes	Yes
No	No	No	mother	No	never	No	after 2006	Yes	Yes
No	No	Yes	mother		sometimes	No	2001-2005	Yes	No
No	No	No	mother	Yes	always	No	2001-2005	Yes	No
No	No	No	mother	Yes	sometimes	No	2001-2005	Yes	No
No	No	No	father	Yes	never	No	1991-2000	Yes	Yes
No	No	No	grandmother	No	sometimes	No	1991-2000	Yes	No
No	No	Yes	mother	No	never	No		No	Yes
No	No	Yes	mother	No	sometimes	No	2001-2005	Yes	Yes
No	Yes	Yes	mother		never	No	2001-2005	Yes	Yes
No	No	No	mother	No	never	No	2001-2005	Yes	Yes
No	No	No	mother	No	sometimes	No	2001-2005	Yes	No
No	No	No	mother	No	never	No	2001-2005	No	Yes
Yes	No	Yes	mother	No	never	No	1991-2000	Yes	Yes
Yes	No	Yes	mother	No	sometimes	No	after 2006	Yes	No
No	No	No	father	Yes	never	No	2001-2005	Yes	Yes
No	No	Yes	father	No	never	No	1991-2000	No	No
Yes	No	Yes	father	Yes	never	No	1991-2000	No	Yes
No	No	Yes	mother	No	sometimes	Yes	2001-2005	Yes	No
No	Yes	No	mother	No	sometimes	No	after 2006	Yes	Yes
No	No	No	mother		sometimes	No			No
No	No	No	grandfather	No	sometimes	No	after 2006	Yes	No
No	No	Yes	mother	Yes	never	No	1991-2000	Yes	Yes
Yes	Yes	Yes	mother	No	never	No	2001-2005	Yes	Yes
No	No	No	mother	Yes	never	No	before 1980	No	No
No	No	No	others	No		No	1991-2000	Yes	No
No	Yes	Yes	mother	No	sometimes	No	1980-1990	No	No
No	Yes	Yes	mother		never	No	after 2006	Yes	No
No	No	No	mother	No	sometimes	Yes	2001-2005	Yes	No
No	Yes	Yes	mother			No		Yes	No
No	No	No	mother	No		No	1980-1990	Yes	No
No	No	No	father	No	never		2001-2005	Yes	No
Yes	No	No	mother	Yes	never	No	1980-1990	No	Yes
Yes	No	No	Yes2	No	sometimes	No	2001-2005	No	Yes
No	No	No	mother	No	sometimes	No	before 1980	No	Yes
No	No	No	mother	No	never	No	2001-2005	Yes	No
No	No	No	mother	Yes	never	No	before 1980		No
Yes	Yes	Yes	mother		never				Yes
Yes	Yes	Yes	mother		always		before 1980	Yes	No
Yes	Yes	Yes	mother		never		2001-2005	Yes	No
Yes	Yes	No	mother		never	Yes	2001-2005	Yes	No
Yes	Yes	Yes	mother		never		2001-2005	Yes	Yes
Yes	Yes	Yes	mother		always		2001-2005	Yes	No
Yes	No	Yes	mother		sometimes		after 2006	Yes	No
Yes	Yes	No	mother		never		2001-2005	Yes	No
Yes	Yes	Yes	father	Yes	never		2001-2005	No	Yes
No	No	Yes	mother	Yes	sometimes		2001-2005	Yes	No
No	No	Yes	father		never		after 2006	Yes	No
Yes	Yes	Yes	mother	Yes	never	Yes	after 2006	Yes	Yes
Yes	Yes	Yes	mother	Yes	never		1991-2000	Yes	Yes
Yes	Yes	Yes	mother	Yes	never		1991-2000	Yes	Yes
No	Yes	No	mother		never	Yes	2001-2005	Yes	Yes
No	No	Yes	mother		never	Yes	2001-2005	Yes	Yes
Yes	Yes	Yes	mother	Yes	never	Yes	2001-2005	Yes	No
No	No	No	mother	Yes	sometimes				No
No	No	Yes	mother		never	Yes	2001-2005	No	No
No	No	No	grandmother		never		2001-2005	No	Yes
No	No	No	mother		never		after 2006	Yes	Yes
No	No	No	grandmother				after 2006	No	No
No	No	No	grandmother				after 2006	No	No
No	No	Yes	mother		never		2001-2005	No	Yes
No	Yes	Yes	father	Yes	sometimes		after 2006	Yes	No
No	No	No	father		never		2001-2005	Yes	Yes
No	No	Yes	mother	Yes	never		2001-2005	No	No
No	No	No	mother		never		before 1980	No	Yes
No	No	No	mother		never		1991-2000	No	No
No	No	No	mother		never		after 2006	Yes	Yes
Yes	No	Yes	mother		sometimes		1991-2000	No	Yes
Yes	Yes	No	mother	Yes	sometimes	No	1991-2000	Yes	No
No	No	No	mother	No	sometimes	No	1980-1990	No	No
Yes	Yes	Yes	mother	Yes	never	No	after 2006	Yes	No
Yes	No	No	father		sometimes	No		No	No
Yes	No	No	mother	No	never	No	after 2006	Yes	No
Yes	Yes	No	mother	No	sometimes	Yes	2001-2005	Yes	Yes
Yes	No	Yes	mother	No	never	No	after 2006	No	Yes
Yes	Yes	No	father	No	sometimes	No	1980-1990	Yes	No
Yes	No	No	mother	No	never	No	1991-2000	Yes	Yes
Yes	No	No	mother	No	never	Yes	1991-2000	No	No
Yes	No	Yes	mother		never	No	1991-2000	No	No
Yes	Yes	Yes	mother	No	sometimes	No	1980-1990	No	Yes
Yes	No	No	mother	No	sometimes	No	2001-2005	Yes	Yes
Yes	No	No	mother	No	sometimes	Yes	2001-2005	No	No
Yes	Yes	Yes	mother	No	never	No		Yes	Yes
Yes	Yes	Yes	mother	Yes	never	No	1991-2000	Yes	No
Yes	No	Yes	mother	Yes	sometimes	No	2001-2005	Yes	No
Yes	No	Yes	father	No	never	No	2001-2005	No	No
Yes	No	No	mother	No	never	No	1980-1990	No	Yes
Yes	Yes	Yes	mother	No	never	Yes	1991-2000	Yes	Yes
Yes	Yes	Yes	mother	No	never	No	1980-1990	No	Yes
Yes	Yes	Yes	mother	Yes	sometimes	No	2001-2005	Yes	Yes
No	No	No	mother			No	after 2006	Yes	No
Yes	Yes	No	mother	Yes	never	No	2001-2005	Yes	Yes
Yes	Yes	Yes	mother	Yes	never	No	2001-2005	Yes	Yes
Yes	Yes	Yes	father	No	never	No	1991-2000	No	Yes
Yes	No	Yes	mother	No	never	Yes	2001-2005	Yes	No
Yes	No	Yes	mother	Yes	sometimes	No	2001-2005	Yes	No
Yes	Yes	Yes	mother	No	never	Yes	2001-2005	Yes	Yes
Yes	Yes	Yes	mother	Yes	never	No	before 1980	No	Yes
Yes	No	Yes	mother	No	sometimes	No	2001-2005	Yes	No
Yes	No	Yes	mother	No	never	No	2001-2005	Yes	No
No	Yes	Yes	mother	Yes	never	Yes	2001-2005	Yes	No
Yes	Yes	Yes	mother	Yes	never	No	1980-1990	No	No
Yes	Yes	Yes	mother	No	never	No	2001-2005	Yes	No
No	No	No	mother	No	never	Yes	2001-2005	Yes	No
No	No	No	mother	No	never	Yes	2001-2005	Yes	No
No	No	Yes	Yes2	No	never	No	1991-2000	Yes	No
Yes	Yes	Yes	mother	No	never	No	1980-1990	Yes	No
No	No	No	mother	Yes	sometimes	No	2001-2005	Yes	Yes
No	No	No	father	Yes	sometimes	Yes	after 2006	Yes	Yes
No	No	No	mother	No	never	No	2001-2005	Yes	No
Yes	No	No	mother	No	sometimes	No	2001-2005	Yes	No
Yes	Yes	Yes	mother	Yes	never	No	2001-2005	Yes	No
No	Yes	Yes	mother	No	never	Yes	2001-2005	Yes	No
Yes	Yes	Yes	mother	Yes	never	No	1980-1990	No	No
Yes	No	No	father	Yes	never	No	1980-1990	No	No
No	Yes	Yes	mother	Yes	never	No	1991-2000	Yes	Yes
Yes	Yes	Yes	father	Yes	never	No	2001-2005	Yes	Yes
Yes	Yes	Yes	mother	Yes	always	No	after 2006	Yes	No
Yes	No	Yes	mother	No	never	No	2001-2005	No	Yes
Yes	Yes	Yes	mother	No	never	No	2001-2005	Yes	No
Yes	No	No	mother		always	No	1991-2000	No	No
No	No	Yes	mother		never	No	2001-2005	Yes	No
Yes	No	Yes	mother	Yes	never	No	after 2006	Yes	No
No	No	No	mother	No	never	No	after 2006	Yes	No
No	No	Yes	mother		never	No	after 2006	Yes	No
No	No	No	mother	No	never	No	after 2006	Yes	No
Yes	No	Yes	mother		never	Yes	2001-2005	Yes	No
No	No	No	mother	No	never	Yes	after 2006	Yes
No	No	No	mother	No	never	No	1980-1990	Yes	Yes
No	No	Yes	mother	No	sometimes	No	2001-2005	Yes	Yes
No	Yes	No	mother	No	never	No	before 1980	No	Yes
Yes	No	No	mother	No	always	Yes	after 2006	No	Yes
Yes	No	No	mother	No	always	Yes	1991-2000	Yes	No
Yes	No	Yes	father	No	always	No	2001-2005	Yes	No
No	No	No	mother	Yes	never	No	2001-2005	No	No
Yes	No	No	mother	No	sometimes	No	after 2006	No	No
Yes	No	No	mother	Yes	never	Yes	after 2006	Yes	Yes
No	Yes	Yes	mother	No	never	No	2001-2005	Yes	Yes
Yes	Yes	Yes	mother	No	always	No	1980-1990	No	No
Yes	Yes	Yes	mother	Yes	never	No	1991-2000	No	No
No	No	No	mother	No		No	2001-2005	Yes	No
No	No	Yes	mother	No	never	No	1980-1990	No	No
[truncated: 3,488 more rows]
